# Supplementary material for: Immune and Metabolic Regulation Mechanism of Dangguiliuhuang Decoction against Insulin Resistance and Hepatic Steatosis
Source: PubMed Central journal article supplement (PMC5500616; doi:10.3389/fphar.2017.00445), 2017-07-07
Supplement: Presentation1.pdf [file Presentation1.pdf]

## Supporting Information

# Immune and Metabolic Regulation Mechanism of Dangguiliuhuang Decoction Against Insulin Resistance and Hepatic Steatosis

Hui Cao<sup>1#</sup>, Lingling Tuo<sup>2#</sup>, Yali Tuo<sup>1</sup>, Ziyun Xia<sup>3</sup>, Rong Fu<sup>1</sup>, Yang Liu<sup>4</sup>, Yihong Quan<sup>2</sup>, Jue Liu<sup>2</sup>, Zhihong Yu<sup>2</sup>, Ming Xiang<sup>1\*</sup>

<sup>1</sup>Department of Pharmacology, School of Pharmacy, Tongji Medical College, Huazhong University of Science and Technology, Wuhan, China

<sup>2</sup>Department of Traditional Chinese Medicine, the Central Hospital of Wuhan, Tongji Medical College, Huazhong University of Science and Technology, Wuhan, China

<sup>3</sup>Department of Pharmacy, China Pharmaceutical University, Nanjing, China

<sup>4</sup>Synergy Innovation Center of Biological Peptide Antidiabetics of Hubei Province, School of Life Science, Wuchang University of Technology, Wuhan, China

### \*Correspondence:

Ming Xiang

E-mail: xiangming@mails.tjmu.edu.cn

<sup>#</sup>These authors contributed equally to this work

**Table S1 | Herbal ingredients in the traditional Chinese medicine formula-DGLHD**

| Scientific Name         | Chinese Name   | Traditional Use or Pharmacology                                                                                                                                                                                                                                                      |
|-------------------------|----------------|--------------------------------------------------------------------------------------------------------------------------------------------------------------------------------------------------------------------------------------------------------------------------------------|
| Angelica sinensis       | Dang Gui       | Used to treat inflammation, cardiovascular conditions, osteoarthritis, headache, infections, mild anemia, fatigue and high blood pressure                                                                                                                                            |
| Phellodendron amurense  | Huang Bai      | Used to treat meningitis, bacillary dysentery, pneumonia, tuberculosis, and liver cirrhosis; Used orally to treat abdominal pain, diarrhoea, gastroenteritis and urinary tract infections; prevent osteoarthritis, lung or prostate tumor progression; help overweight/obese people. |
| Scutellaria baicalensis | Huang Qin      | Used to inhibit inflammation, hepatitis, and diarrhea; treat gynaecological conditions; treat anxiety and muscle tension.                                                                                                                                                            |
| Coptis chinensis        | Huang Lian     | Used to against intestinal injury, atherosclerosis, neurodegeneration, the pain of irritable bowel syndrome                                                                                                                                                                          |
| Astragalus membranaceus | Huang Qi       | Used to treat diabetes, heal and seasonal allergic rhinitis                                                                                                                                                                                                                          |
| Radix Rehmanniae        | Sheng Di Huang | Used to treat exogenous heat                                                                                                                                                                                                                                                         |
| Rehmannia glutinosa     | Shu Di Huang   | Used to treat diabetes mellitus, tinnitus deafness, dizzy head and vision, premature graying in beard and hair, constipation, kidney vacuity hasty asthma.                                                                                                                           |

**Table S2 | Forward and reverse primers applied to quantitative real-time PCR analysis**

| <b>Gene</b>      | <b>Forward primer</b>          | <b>Reverse primer</b>        |
|------------------|--------------------------------|------------------------------|
| ACC-1            | GAGTGACTGCCGAAACATCTCTG        | GCAAGGAGGACAGAGTTTATCGTG     |
| Adiponectin      | GCACTGGCAAGTTCTACTGCAA         | GTAGGTGAAGAGAACGGCCTTGT      |
| CD36             | TTGGCCAAGCTATTGCGACA           | GCAAAGGCATTGGCTGGAAG         |
| FAS              | GCTGCGGAAACTTCAGGAAAT          | AGAGACGTGTCACTCCTGGACTT      |
| Foxp3            | ATCTCCTGGATGAGAAAGGCAAGG       | AGAGCTCTTGTCATTGAGGCCA       |
| Glut1            | CAGTTCGGCTATAAACTGGTG          | GCCCCGACAGAGAAGATG           |
| Glut2            | ATCCCTTGTTTCATGGTTGCTG         | TCCGCAATGTACTGGAAGCAG        |
| Glut4            | GTGACTGGAACACTGGTCCTA          | CCAGCCACGTTGCATTGTAG         |
| IDO              | TTGCCAAATGTGACTGCT             | CAAATAATGACAAATCCCT          |
| IFN- $\gamma$    | CTTTGCAGCTCTTCCTCATGGCTGTTTCTG | TGACGCTTATGTTGTTGCTGATGGCCTG |
| IL-1 $\beta$     | CCAGCTTCAAATCTCACAGCAG         | CTTCTTTGGGTATTGCTTGGGATC     |
| IL-6             | ACAACGATGATGCACTTGCAGA         | GATGAATTGGATGGTCTTGGTC       |
| IL-10            | TGGCCCAGAAATCAAGGAGC           | CAGCAGACTCAATACAACT          |
| ILT-3            | AAAGGCTGGAACATATGAG            | AGGAGACAATGAGGTGGA           |
| PPAR- $\gamma$   | GTGCCAGTTTCGATCCGTAGA          | GGCCAGCATCGTGTAGATGA         |
| SREBP-1c         | GATGTGCGAACTGGACACAG           | CATAGGGGGCGTCAAACAG          |
| TGF- $\beta$ 1   | CACTGATACGCCTGAGTG             | GTGAGCGCTGAATCGAAA           |
| TNF- $\alpha$    | CACAGAAAGCATGATCCGCGACGT       | CGGCAGAGAGGAGGTTGACTTTCT     |
| hTNF- $\alpha$   | CCAGGCAGT CAGATCATCTTCTC       | AGCTGGTTATCTCTCAGCTCCAC      |
| hIL-6            | CAATCTGGATTCAATGAGGAGAC        | TCTGGCTTGTTCCCTCACTACTC      |
| $\beta$ -actin   | TGTGATGGTGGGAATGGGTCAG         | TTTGATGTCACGCACGATTCC        |
| h $\beta$ -actin | TCAGAAGGATTCCTATGTGGGCGA       | TTTCTCCATGTCGTCCCAGTTGGT     |

**Table S3 | Serum biochemistry levels in C57BL/6J mice treated with water or DGLHD**

| Group         | Body weight (g)  | Liver weight (g) | TG (mM)         | TC (mM)         | FFA( $\mu$ M)      | ALT(U/L)         | AST(U/L)          |
|---------------|------------------|------------------|-----------------|-----------------|--------------------|------------------|-------------------|
| Control       | 23.67 $\pm$ 1.36 | 1.07 $\pm$ 0.11  | 1.57 $\pm$ 0.36 | 1.48 $\pm$ 0.23 | 120.78 $\pm$ 23.87 | 29.49 $\pm$ 4.37 | 82.93 $\pm$ 12.87 |
| Control+DGLHD | 23.40 $\pm$ 1.83 | 1.11 $\pm$ 0.08  | 1.51 $\pm$ 0.28 | 1.41 $\pm$ 0.45 | 130.56 $\pm$ 21.29 | 30.56 $\pm$ 5.24 | 90.16 $\pm$ 10.36 |

*Data are expressed as mean  $\pm$  SEM (n=5). TG: triglyceride; TC: total cholesterol; FFA: free fatty acid; ALT: alanine aminotransferase; AST: aspartate aminotransferase.*

**Table S4 | Effect of DGLHD on serum cytokines level in C57BL/6J mice treated with water or DGLHD**

| Group         | IL-6 (pg/ml)       | IL-10 (pg/ml)    | IFN- $\gamma$ (pg/ml) | TGF- $\beta_1$ (pg/ml) | TNF- $\alpha$ (pg/ml) | Insulin (ng/ml) |
|---------------|--------------------|------------------|-----------------------|------------------------|-----------------------|-----------------|
| Control       | 198.13 $\pm$ 57.86 | 75.56 $\pm$ 5.94 | 304.43 $\pm$ 39.58    | 1662.61 $\pm$ 180.76   | 87.11 $\pm$ 21.45     | 0.53 $\pm$ 0.11 |
| Control+DGLHD | 216.58 $\pm$ 51.92 | 73.72 $\pm$ 9.31 | 314.94 $\pm$ 33.02    | 1707.63 $\pm$ 159.85   | 88.85 $\pm$ 20.24     | 0.50 $\pm$ 0.09 |

*Data are expressed as mean  $\pm$  SEM (n=5). IL-6: interleukin-6; IL-10: interleukin-10; IFN- $\gamma$ : interferon- $\gamma$ ; TGF- $\beta_1$ : transforming growth factor- $\beta_1$ ; TNF- $\alpha$ : tumor necrosis factor- $\alpha$ .*

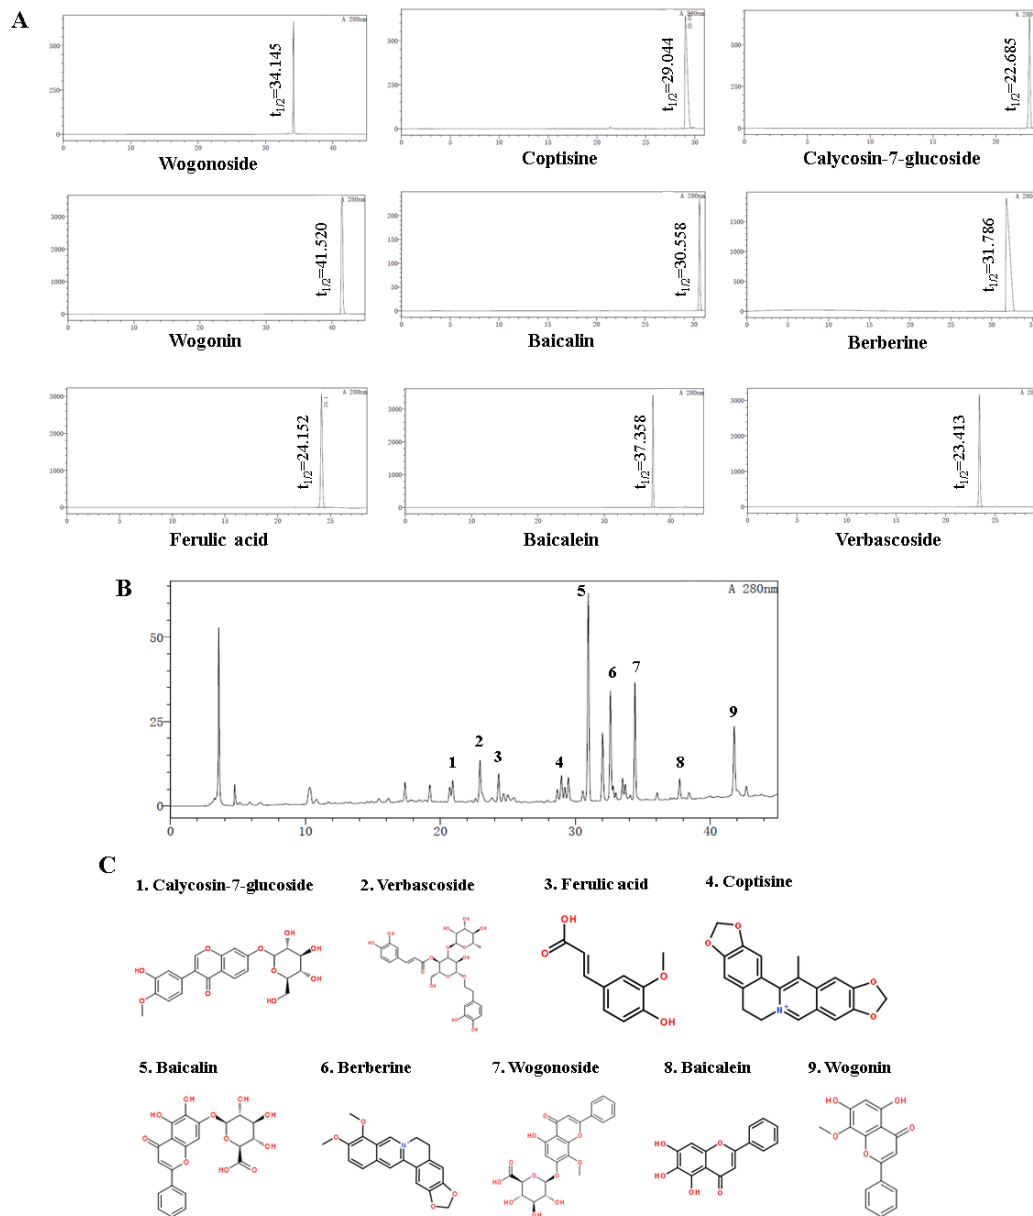

**Figure S1 | HPLC chromatogram and chemical structure of the main compounds in DGLHD.** (A) Representative chromatograms of primary compounds in DGLHD. (B) Representative HPLC chromatogram of DGLHD. (C) Chemical structure of principal active components.

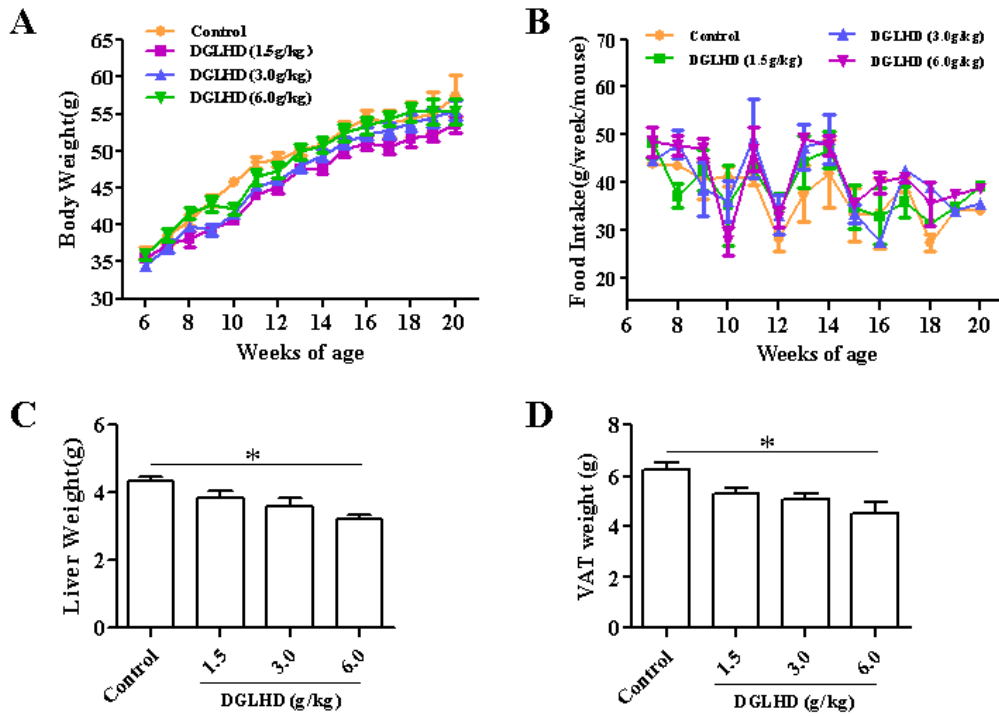

**Figure S2 | DGLHD decreased the weight of visceral adipose tissue (VAT) and liver in ob/ob mice.** Ob/ob mice were treated daily with water or DGLHD at 1.5, 3.0 or 6.0g/kg by intragastric gavage for 8 weeks (n=5 for each group). Body weight (A) and food intake (B) were assessed in mice. The weights of liver (C) and VAT (D) were shown. Data are represented as mean±SEM. Statistical significance was determined by Student's t test. \* $P < 0.05$  vs. Control.

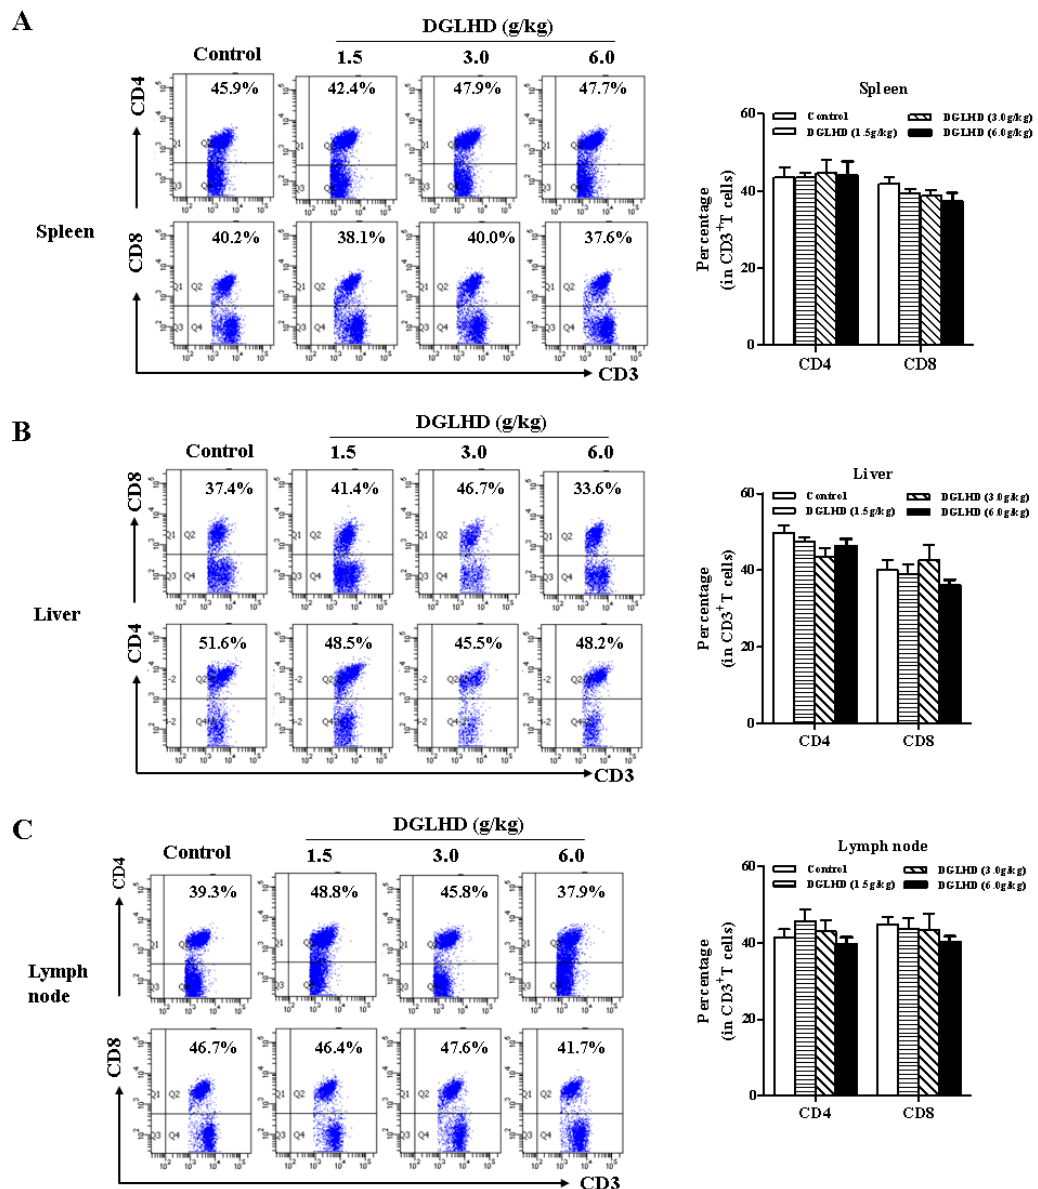

**Figure S3** | DGLHD has no apparent effects on the proportion of CD4<sup>+</sup> and CD8<sup>+</sup>T cells. Spleen, lymph node, and liver were derived from ob/ob mice. (A-C) Representative FACS staining for CD4 and CD8 on gated CD3<sup>+</sup>T cells and the percentage of CD4<sup>+</sup> and CD8<sup>+</sup> T cells in spleen (A), liver (B) and lymph node (C). Data are expressed as mean±SEM (n = 3-4).

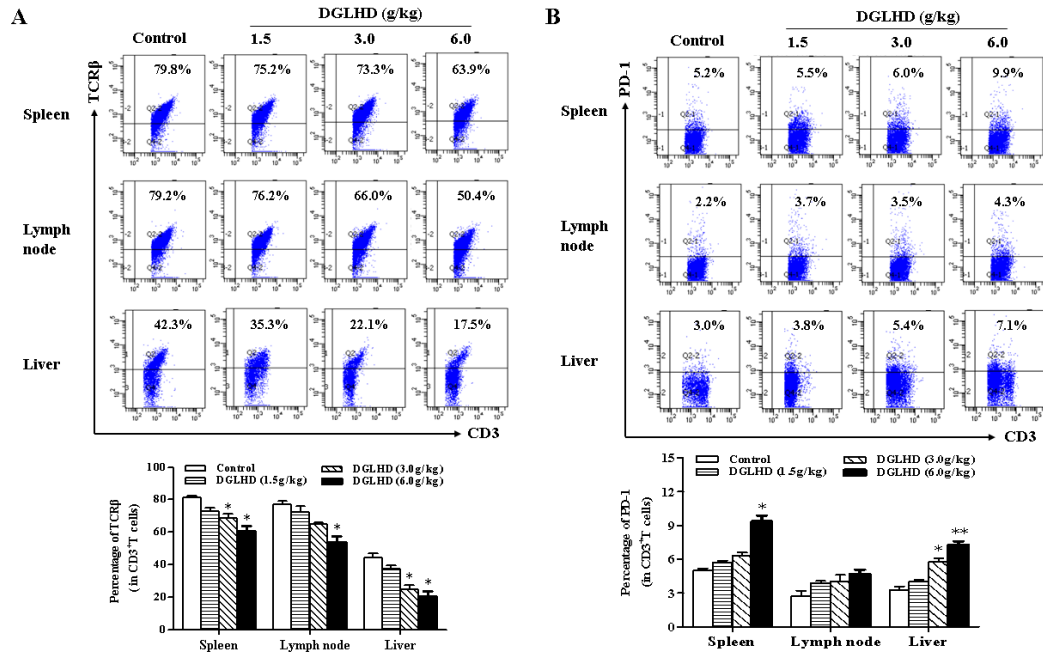

**Figure S4** | Effects of DGLHD on TCR $\beta$  and PD-1 expression in T cells. Spleen, lymph node and liver were generated from 14 week-old ob/ob mice. Expression levels of TCR $\beta$  (A) and PD-1 (B) in CD3<sup>+</sup>T cells from spleen, lymph node and liver were detected by FCM. Data are represented as mean $\pm$ SEM (n = 4). \* $P$  < 0.05, \*\* $P$  < 0.01 vs. Control.



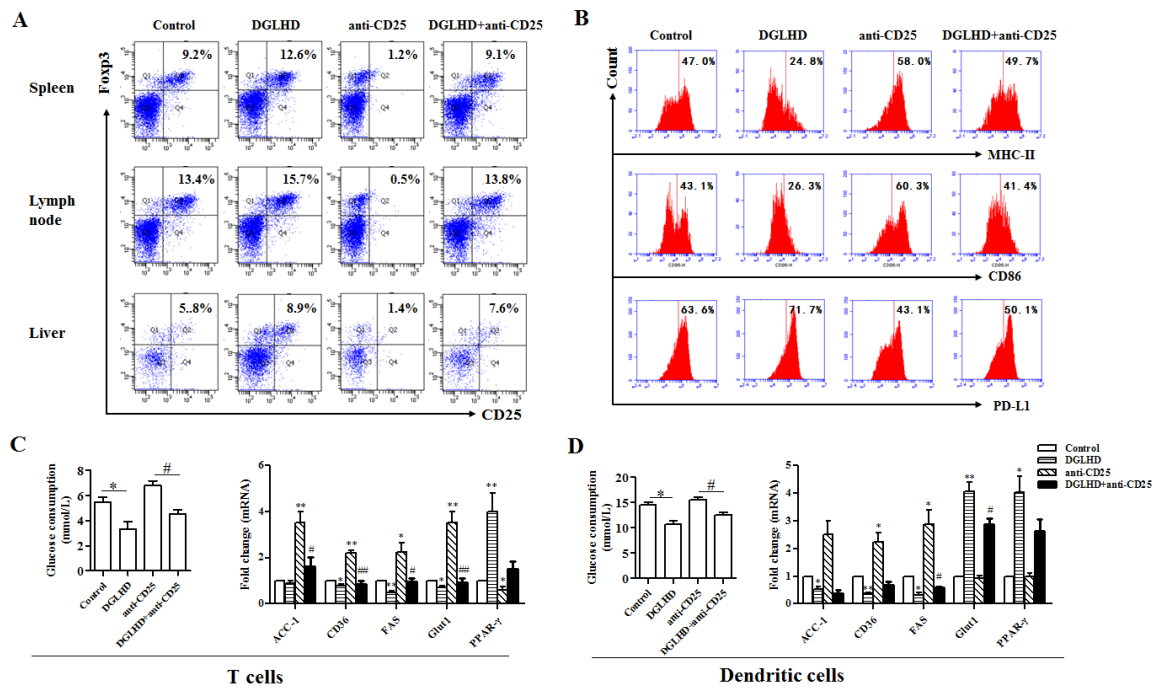

**Figure S5 | DGLHD altered the function and metabolism of T cells and DCs in Tregs-depleted ob/ob mice.** Tregs in ob/ob mice were neutralized with anti-CD25 antibody. (A) Tregs percentage in CD4<sup>+</sup>T cells were analyzed by FCM. (B) The levels of CD86, MHC-II and PD-L1 in DCs were examined by FCM. Glucose utilization and relative expression of genes in T cells (C) and DCs (D) from ob/ob mice. Data are expressed as mean $\pm$ SEM (n = 3-4). \**P* < 0.05, \*\**P* < 0.01 vs. Control; #*P* < 0.05, ##*P* < 0.01 vs. anti-CD25 group.

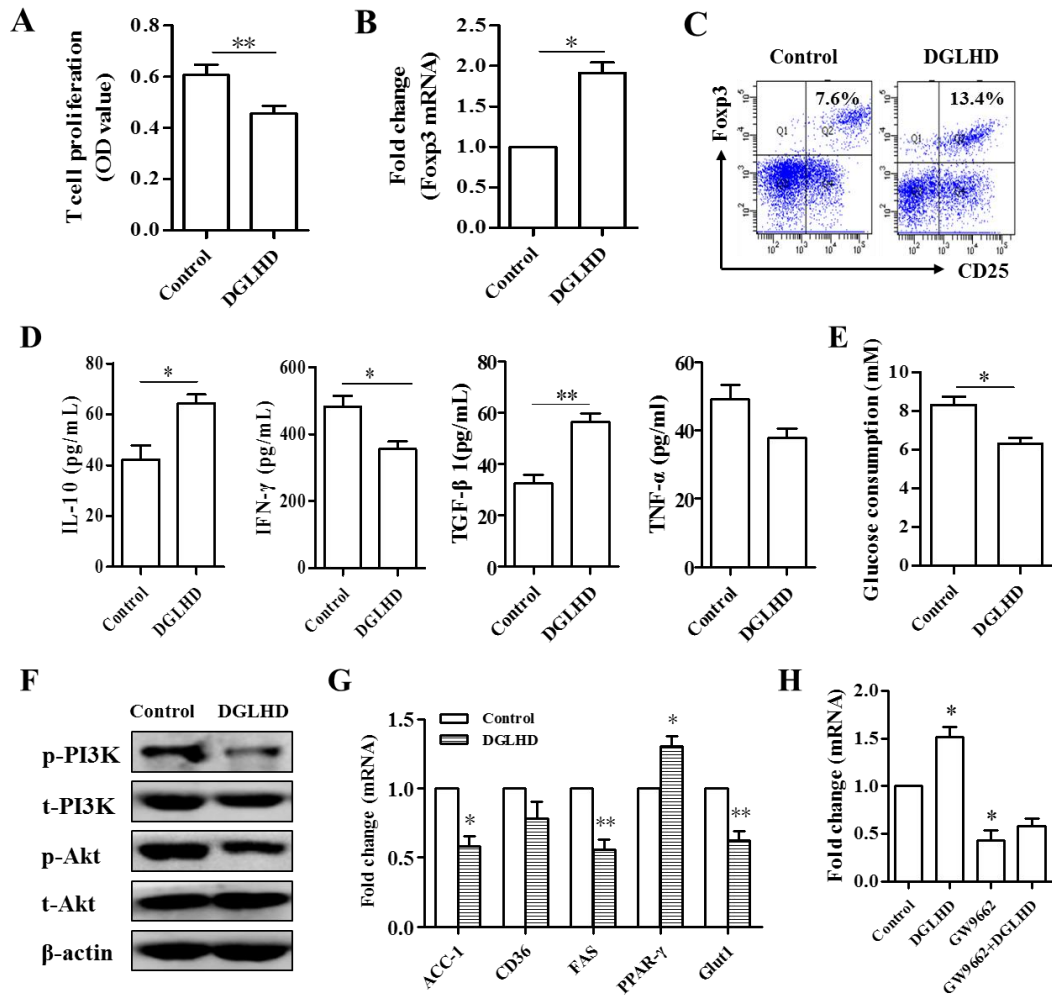

**Figure S6** | DGLHD induces Tregs differentiation through altered T cell metabolism *in vitro*. CD4<sup>+</sup>T cells were isolated from the spleen of ob/ob model mice by anti-CD4 immunomagnetic beads, then incubated with DGLHD (5mg/mL) or/and PPAR- $\gamma$  antagonist - GW9662 (25 $\mu$ M) for 24 hours. (A) DGLHD suppressed T cell proliferation. (B) Foxp3 mRNA level in T cells. (C) Tregs proportion in CD4<sup>+</sup>T cells were measured by FCM. (D) The secretion of IL-10, IFN- $\gamma$ , TGF- $\beta$ 1, and TNF- $\alpha$  in CD4<sup>+</sup>T cells suspension were assessed by ELISA. (E) Glucose consumption of CD4<sup>+</sup>T cells. (F) Proteins expression of PI3K, p-PI3K, Akt and p-Akt were examined in CD4<sup>+</sup>T cells by Western blotting. (G) Metabolic-related genes expression in CD4<sup>+</sup>T cells. (H) PPAR- $\gamma$  mRNA level in CD4<sup>+</sup>T cells. Data are presented as mean $\pm$ SEM (n=3). \* $P$  < 0.05, \*\* $P$  < 0.01 vs. Control.

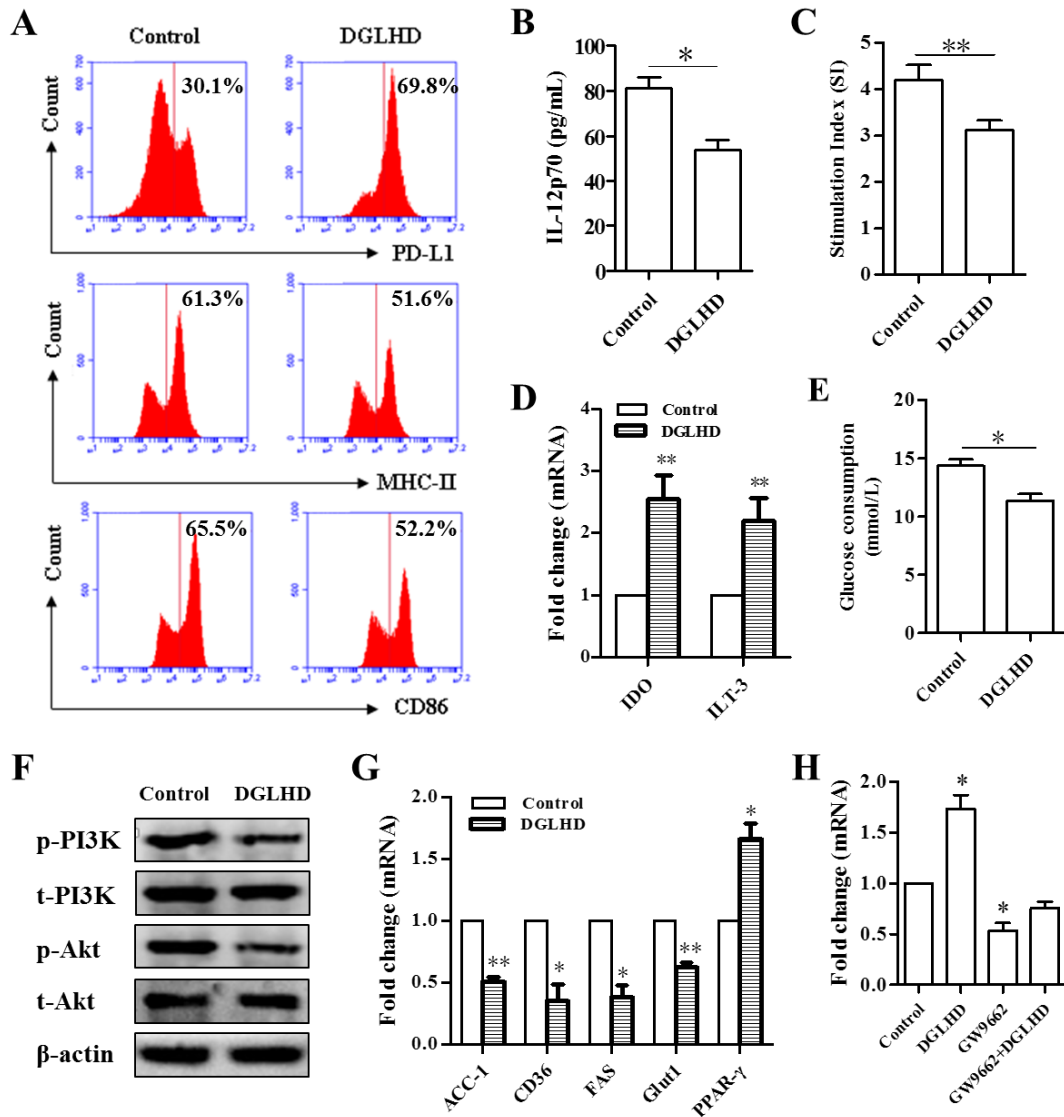

**Figure S7** | DGLHD regulates the maturation and function of DCs via changing its metabolic characteristics *in vitro*. Bone marrow dendritic cells were obtained from ob/ob mice, then incubated with DGLHD (5mg/mL) or/and GW9662 (25 $\mu$ M) for 24 hours. (A) Expression of PD-L1, MHC-II, and CD86 in DCs were determined by FCM. (B) Secretion of IL-12p70 cytokine from DCs was assessed by ELISA. (C) The capacity of DCs stimulating T cells proliferation in MLR. (D) Gene levels of IDO and ILT3 were detected by qRT-PCR. (E) Glucose consumption in DCs. (F) Protein levels were measured by Western blotting. (G) Metabolic-related gene expression in DCs. (H) The gene level of PPAR- $\gamma$  in DCs. Data are shown as mean $\pm$ SEM (n=3). \* $P$  < 0.05, \*\* $P$  < 0.01 vs. Control.

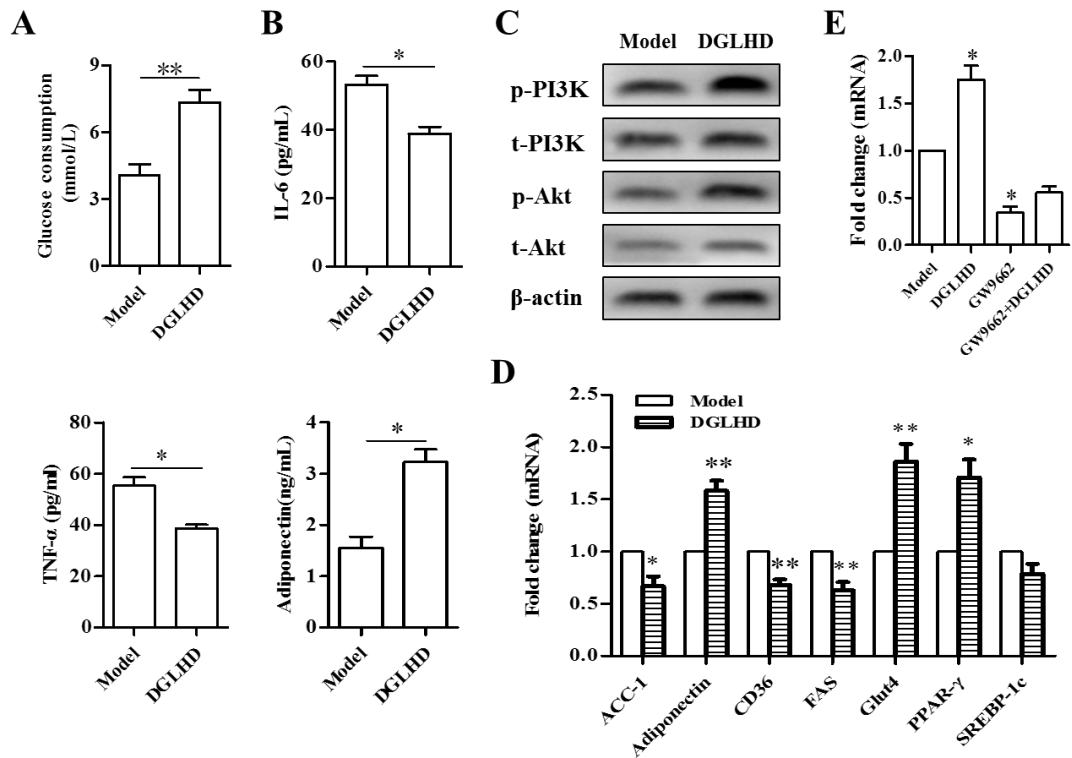

**Figure S8** | DGLHD relieves the insulin resistance of 3T3-L1 adipocytes. 3T3-L1 preadipocytes were induced into insulin resistant adipocytes, then co-cultured with DGLHD (5mg/mL) or/and GW9662 (25μM) for 24 hours. (A) Glucose uptake of 3T3-L1 cells. (B) Concentration of IL-6, TNF-α and adiponectin in adipocytes suspension were evaluated by ELISA. (C) Proteins level of PI3K, p-PI3K, Akt and p-Akt were detected by Western blotting. (D) Genes expression level were analyzed by qRT-PCR. (E) PPAR-γ gene expression level. Data are expressed as mean±SEM (n=3). \* $P < 0.05$ , \*\* $P < 0.01$ , compared with Model.

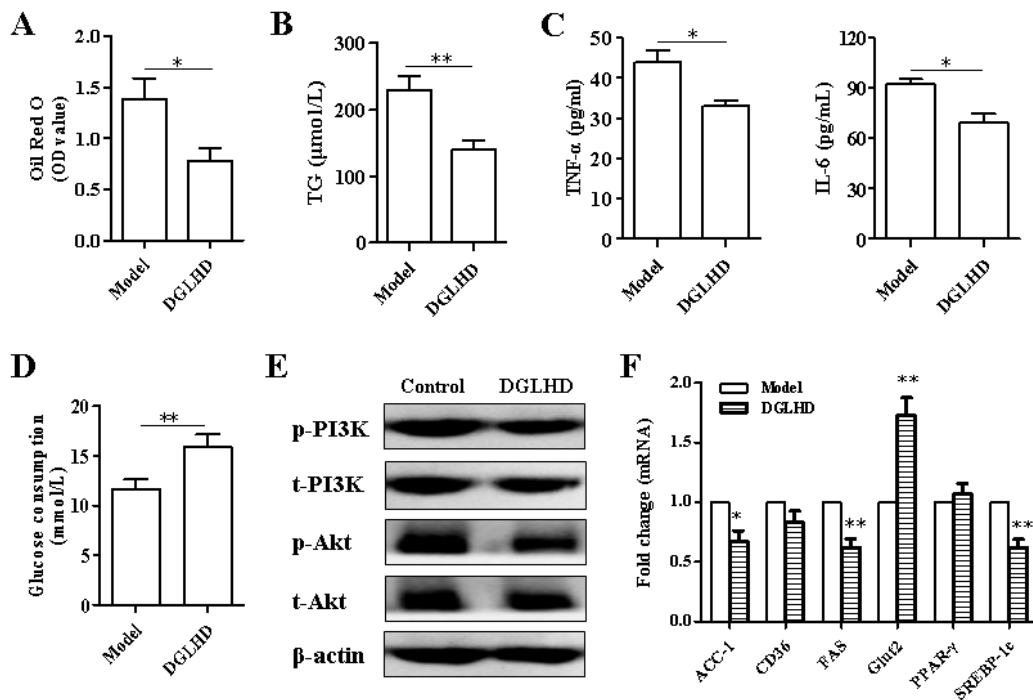

**Figure S9** | DGLHD attenuates steatosis in HepG2 cells. HepG2 cells were constructed a steatosis-like status, and incubated with DGLHD (5mg/mL) for 24 hours at the same time. (A) The lipid content in steatotic cells were measured by Oil Red O staining. (B) TG level was quantified by GPO-PAP method. (C) Production of IL-6 and TNF- $\alpha$  cytokines in cells supernatant. (D) Glucose consumption of HepG2 cells. (E) Protein levels were examined by Western blotting. (F) qRT-PCR was used to analyze gene expression. Data are shown as mean $\pm$ SEM (n=3). \* $P < 0.05$ , \*\* $P < 0.01$ , compared with Model.
