# Supplementary material for: Immune and Metabolic Regulation Mechanism of Dangguiliuhuang Decoction against Insulin Resistance and Hepatic Steatosis
Source: Front Pharmacol. 2017 Jul 7;8:445. doi: 10.3389/fphar.2017.00445 (PMC5500616; doi:10.3389/fphar.2017.00445)
Supplement: Supplementary file 2 [file DataSheet1.XLSX]

## Sheet: VAT
Metabolites in visceral adipose tissue			Content(Value)
KEGG_ID	Biochemical_Name	Classe	Control	DGLHD	Fold change
C05951	Leukotrienes D4	Lipid	100	540	5.4
C08364	Punicic acid	Lipid	729000	1470000	2.01646
	9-Hydroxy-(10E,12Z,15Z)-octadecatrienoic acid	Lipid	198000	335000	1.69192
C00410	Progesterone	Lipid	8480	13700	1.61557
C00670	sn-Glycero-3-phosphocholine	Lipid	5130000	8140000	1.58674
	(9Z, 12Z)-Octadecadienoate	Lipid	3750	5890	1.57067
C05963	Thromboxane B2	Lipid	32600	47600	1.46012
	12,13-EODE	Lipid	2550000	3670000	1.43922
C03990	Lithocholic acid	Lipid	51100	69100	1.35225
C02140	Corticosterone	Lipid	11200	14500	1.29464
C00836	Dihydrosphingosine	Lipid	9730	12300	1.26413
	Lysophosphatidylcholine (1-acyl 16:0)	Lipid	62900000	76500000	1.21622
C12145	4-Hydroxysphinganine	Lipid	29200000	33600000	1.15068
	13-hydroxy calendic acid	Lipid	30800	32400	1.05195
C05122	Taurocholate	Lipid	41700	42400	1.01679
	5S,12R-dihydroxy-6Z,8E,10E,14Z,17Z-eicosapentaenoic acid	Lipid	100	100	1
C13154	Dehydrocholic acid	Lipid	85900	58800	0.684517
	8,15-Dihydroxy eicosatetraenoic acid	Lipid	27500	14600	0.530909
	15-hydroxy eicosatetraenoic acid	Lipid	765000	347000	0.453595
	12-Hydroxy eicosatetraenoic acid	Lipid	914000	393000	0.429978
	Llysophosphatidylcholine(1-acyl 18:3)	Lipid	9700000	3840000	0.395876
C00487	Carnitine	Lipid	10500	4080	0.388571
	20-Hydroxy Docosahexaenoic acid	Lipid	1000	373	0.373
	9,10-Dihydroxy octadecenoic acid	Lipid	126000	46400	0.368254
C00187	Cholesterol	Lipid	44600	16000	0.358744
C01601	Pelargonic acid	Lipid	1570000	507000	0.32293
C01571	Capric acid	Lipid	2360000	659000	0.279237
	Lysophosphatidylcholine (1-acyl 18:2)	Lipid	7700000	2080000	0.27013
C02165	Leukotrienes B4	Lipid	1360	257	0.188971
	13-hydroperoxy octadecatrienoic acid	Lipid	765	100	0.130719
	Lysophosphatidylcholine(1-acyl 16:1)	Lipid	20500000	2420000	0.118049
C00696	Prostaglandin D2	Lipid	1820000	99200	0.0545055
C00639	Prostaglandin F2a	Lipid	3810	100	0.0262467
	20-Hydroxy Leukotrienes B4	Lipid	5640	100	0.0177305
C05957	Prostaglandin J2	Lipid	815000	8900	0.0109202
C00695	Cholate	Lipid	13400	100	0.00746269
C00064	L-Glutamine	Amino acid	240000	1620000	6.75
C00152	L-Asparagine	Amino acid	195000	1060000	5.4359
C00780	Serotonin	Amino acid	8670	41400	4.77509
C00542	Cystathionine	Amino acid	8400	27400	3.2619
C18623	Phenylglycine	Amino acid	9100	29500	3.24176
C00768	Histidine	Amino acid	143000	450000	3.14685
C01026	Dimethylglycine	Amino acid	3700000	11500000	3.10811
	S-(5'-Adenosyl)-L-methionine	Amino acid	40400	115000	2.84653
	3-Iodotyrosine	Amino acid	31900	81500	2.55486
C00065	L-Serine	Amino acid	1190000	3010000	2.52941
	Homoproline	Amino acid	1490	3300	2.21477
C00047	L-Lysine	Amino acid	4530000	9440000	2.08389
	D-3-Methylhistidine	Amino acid	8770	17800	2.02965
C20843	Gamma-glutamyl Glutamine	Amino acid	22900	45700	1.99563
C00819	D-Glutamine	Amino acid	48000	87000	1.8125
C00041	L-Alanine	Amino acid	2100000	3790000	1.80476
C00386	Carnosine	Amino acid	23500	42200	1.79574
	Tiglylglycine	Amino acid	31200	50600	1.62179
C00188	L-Threonine	Amino acid	1400000	2260000	1.61429
C01879	Pyroglutamic acid	Amino acid	156000	232000	1.48718
C05519,C12317	allo-Threonine	Amino acid	1150000	1670000	1.45217
C00327	Citrulline	Amino acid	224000	319000	1.42411
C00355	3,4-Dihydroxy-L-phenylalanine	Amino acid	6990	9720	1.39056
C00884	Homocarnosine	Amino acid	6860	9180	1.33819
C00148,C00763	Proline	Amino acid	63500	69500	1.09449
C02155	Glycyl-L-leucine	Amino acid	2790	3050	1.09319
	4-Guanidinobutanoic acid	Amino acid	100	100	1
	L-Tryptamine	Amino acid	100	100	1
	S-Carboxymethylcysteine	Amino acid	36800	36500	0.991848
	Na,Na-Dimethylhistidine	Amino acid	87300	77500	0.887743
	3-(2-Naphthyl)-D-alanine	Amino acid	83700	74100	0.885305
	L-beta-Homotryptophan	Amino acid	94300	83400	0.884411
	beta-Homothreonine	Amino acid	2480000	2110000	0.850806
C03283	2,4-Diaminobutyrate	Amino acid	431000	350000	0.812065
	L-Pipecolic acid	Amino acid	31700	24700	0.77918
C00979	O-Acetyl-L-serine	Amino acid	17000000	13200000	0.776471
C00049,C00402	aspartic acid	Amino acid	2530000	1860000	0.735178
C00123	L-Leucine	Amino acid	51700000	37100000	0.717602
C07997	Eflornithine	Amino acid	80500	57100	0.709317
C00302	Glutamic acid	Amino acid	17800000	12400000	0.696629
	3-Chloro-L-tyrosine	Amino acid	98900	67400	0.681496
C00079	L-Phenylalanine	Amino acid	48900000	33300000	0.680982
C01602	Ornithine	Amino acid	1880000	1280000	0.680851
C01026	N,N-Dimethylglycine	Amino acid	47500	32300	0.68
C02057	Phenylalanine	Amino acid	49800000	32900000	0.660643
	Homo-L-arginine	Amino acid	14500	9120	0.628966
C00135	L-Histidine	Amino acid	2850000	1790000	0.62807
C00408	Pipecolic acid	Amino acid	462000	290000	0.627706
C01586	Hippuric acid	Amino acid	4680	2890	0.617521
C00025	L-Glutamic acid	Amino acid	2350000	1450000	0.617021
	N-Acetylleucine	Amino acid	150000	90600	0.604
C00062	L-Arginine	Amino acid	4070000	2400000	0.589681
C01005,C02532	O-Phosphoserine	Amino acid	116000	66200	0.57069
	a-Methylserine	Amino acid	66900	36800	0.550075
C00183	L-Valine	Amino acid	20400000	9450000	0.463235
C00082	L-Tyrosine	Amino acid	9290000	4190000	0.451023
C00148	L-Proline	Amino acid	13300000	5970000	0.448872
C02727	N6-Acetyl-L-lysine	Amino acid	63300	28200	0.445498
	o-Hydroxyhippurate	Amino acid	6170	2570	0.416532
C19716	N-Hydroxy-L-tryptophan	Amino acid	10100	3970	0.393069
C00643	Oxitriptan	Amino acid	21500	7920	0.368372
C00407	L-Isoleucine	Amino acid	4670000	1720000	0.368308
C01933	L-Norleucine	Amino acid	537000	196000	0.364991
C02261	D-2-Aminobutyrate	Amino acid	18000000	6470000	0.359444
C03519	N-Acetyl-L-phenylalanine	Amino acid	31300	11200	0.357827
C00049	L-Aspartic acid	Amino acid	8900000	3110000	0.349438
C00073	L-Methionine	Amino acid	3070000	1050000	0.34202
C10164	Picolinic acid	Amino acid	2620	880	0.335878
C00736	Cysteine	Amino acid	12600	3720	0.295238
C02470	Xanthurenic acid	Amino acid	35600	9970	0.280056
C00328	L-Kynurenine	Amino acid	130000	35100	0.27
C02712	N-Acetylmethionine	Amino acid	34800	7460	0.214368
	N-Acetylglutamate	Amino acid	21600	4410	0.204167
C01817	L-Homocystine	Amino acid	14500	2930	0.202069
C00078	L-Tryptophan	Amino acid	6830000	1380000	0.20205
	N-Acetyl-DL-glutamic acid	Amino acid	115000	22900	0.19913
	1-Amino-1-cyclopentanecarboxylic acid	Amino acid	1260000	243000	0.192857
C00082,C00585	tyrosine	Amino acid	67900	12500	0.184094
C01817	Homocystine	Amino acid	402000	49900	0.124129
C00021	S-Adenosylhomocysteine	Amino acid	276000	33100	0.119928
C00300	Creatine	Amino acid	24600000	2790000	0.113415
C00449	Saccharopine	Amino acid	317000	34400	0.108517
C03406	Argininosuccinate	Amino acid	70600	7090	0.100425
C02486	Beta-Leucine	Amino acid	1090000	102000	0.093578
C02710	N-Acetyl-L-leucine	Amino acid	12100	762	0.0629752
	Lysine butyrate	Amino acid	4160000	244000	0.0586538
C01042	N-Acetyl-L-aspartic acid	Amino acid	77300	3510	0.0454075
C00051	Glutathione	Amino acid	1990000	32100	0.0161307
C00152	L-Asparagine	Amino acid	10600	100	0.00943396
C00089	Sucrose	Carbohydrate	5980	75300	12.592
	2-Propenyl (sinigrin)	Carbohydrate	42600	45100	1.05869
C01835	Maltotriose	Carbohydrate	100	100	1
C12285	Sucralose	Carbohydrate	14500	14200	0.97931
	D-(+)-Trehalose	Carbohydrate	4290	3320	0.773893
C00117	D-Ribose 5-phosphate	Carbohydrate	241000	183000	0.759336
	alpha-D-Glucose-1,6-diphosphate	Carbohydrate	7310000	4760000	0.651163
C00644	Mannitol 1-phosphate	Carbohydrate	3850000	2430000	0.631169
C00031	D-Glucose	Carbohydrate	292000	138000	0.472603
C00329	Glucosamine	Carbohydrate	2050000	927000	0.452195
C00085,C05345	Fructose 6-phosphate	Carbohydrate	6400000	2810000	0.439063
	Fructose 1,6-diphosphate	Carbohydrate	4410000	1500000	0.340136
C01796	D-(-)-Erythrose	Carbohydrate	115000	38400	0.333913
C00092	Glucose 6-phosphate	Carbohydrate	18700	5970	0.319251
C00257	Gluconic acid	Carbohydrate	675000	144000	0.213333
	5-Ethyl-2'-deoxyuridine	Carbohydrate	42800	5190	0.121262
	Uridine 5'-diphospho-N-acetylgalactosamine	Carbohydrate	350000	9480	0.0270857
	Glucose 1-phosphate(2)	Carbohydrate	38000	898	0.0236316
C05841	Nicotinate ribonucleoside	Carbohydrate	18900	100	0.00529101
	Orotidine 5'-monophosphate	Nucleotide	12600	26400	2.09524
C01367	Adenosine 3'-monophosphate	Nucleotide	191000	254000	1.32984
C02961	Cytosine arabinoside	Nucleotide	18800	24900	1.32447
C00130	Inosinic acid	Nucleotide	58100	75000	1.29088
	Adenosine 3',5'-cyclicmonophosphate	Nucleotide	144000	173000	1.20139
C02494	1-Methyladenosine	Nucleotide	194000	226000	1.16495
C00147	Adenine	Nucleotide	100	100	1
	Uridine 5'-diphospho-D-glucose	Nucleotide	37900	35500	0.936675
C00144	Guanosine monophosphate	Nucleotide	36300	33700	0.928375
C00105	Uridine 5'-monophosphate	Nucleotide	143000	125000	0.874126
C00104	Inosine-5'-diphosphate	Nucleotide	685	550	0.80292
C00008	Adenosine 5'-diphosphate	Nucleotide	25300	19600	0.774704
C00144	Guanosine 5'-monophosphate	Nucleotide	92900	71700	0.771798
C07599	Oxypurinol	Nucleotide	344000	249000	0.723837
	5'-S-Methylthioadenosine	Nucleotide	271000	195000	0.719557
C00170	5'-Deoxy-5'-(methylthio)adenosine	Nucleotide	262000	184000	0.70229
C00214	Thymidine	Nucleotide	31400	21300	0.678344
C00020,C00946,C01367	Adenosine monophosphate	Nucleotide	164000	109000	0.664634
C06196	dIMP	Nucleotide	72000	39000	0.541667
	N2-Isobutyryl-2'-deoxyguanosine	Nucleotide	10200	4710	0.461765
	Succinyladenosine	Nucleotide	1440000	627000	0.435417
C04037	Galacturonate 1-phosphate	Nucleotide	1840	732	0.397826
C15587	Purine	Nucleotide	565000	215000	0.380531
C01762	Xanthosine	Nucleotide	4560000	1720000	0.377193
C16614	6-Methylmercaptopurine	Nucleotide	4500000	1650000	0.366667
C02380	6-Mercaptopurine	Nucleotide	361000	128000	0.354571
C00299	Uridine	Nucleotide	4520000	1330000	0.294248
	3'-Dephosphocoenzyme A	Nucleotide	5140	1450	0.282101
	2'-Deoxyadenosine monohydrate	Nucleotide	198000	49700	0.25101
C00360	2'-Deoxyadenosine-5'-monophosphate	Nucleotide	25200	5830	0.231349
C00475	Cytidine	Nucleotide	4440000	996000	0.224324
C00242	Guanine	Nucleotide	31900	6920	0.216928
	Guanine derivative	Nucleotide	31600	6850	0.216772
C00559	2'-Deoxyadenosine	Nucleotide	7900	1520	0.192405
C00262	Hypoxanthine	Nucleotide	3190000	541000	0.169592
	5-Methylcytidine	Nucleotide	43700	6960	0.159268
	Etamiphylline	Nucleotide	1720000	251000	0.14593
C00294	Inosine	Nucleotide	39500000	5000000	0.126582
	2'-Deoxyinosine-5'-monophosphate	Nucleotide	3640000	389000	0.106868
C00212	Adenosine	Nucleotide	6120000	598000	0.0977124
C00006	beta-Nicotinamide adenine dinucleotide	Nucleotide	55700	4880	0.0876122
C00387	Guanosine	Nucleotide	6800000	568000	0.0835294
	Threonyl carbamoyl adenosine	Nucleotide	89300	7180	0.0804031
C03794	Adenylosuccinate	Nucleotide	1430	100	0.0699301
	N2, N2-Dimethylguanosine	Nucleotide	275000	11200	0.0407273
	Uridine diphosphategalactose	Nucleotide	2400000	60000	0.025
	N2, N2-Dimethyguanosine	Nucleotide	228000	5470	0.0239912
	Adenosine 5'-diphospho-glucose	Nucleotide	6650	100	0.0150376
	Nicotinic acid mono nucleotide	Nucleotide	88900	832	0.00935883
C02242	7-Methylguanine	Nucleotide	13600	1640	0.120588
	1H-indole-3-carboxylic acid	Nitrogen compounds	184000	399000	2.16848
	Etamiphylline	Nitrogen compounds	95000	179000	1.88421
C17203	N-hydroxy tryptamine	Nitrogen compounds	19400	24900	1.28351
C01996	Acetylcholine	Nitrogen compounds	71200	85300	1.19803
	Chinese bittersweet alkaloid II	Nitrogen compounds	6480000	7750000	1.19599
	Methylergometrine	Nitrogen compounds	508000	604000	1.18898
	4beta-Hydroxy-11-O-(2'-pyrolylcarboxy)epilupinine	Nitrogen compounds	13200	15600	1.18182
C01479 ,C02046	Hyoscyamine	Nitrogen compounds	603000	696000	1.15423
C00314	Pyridoxine	Nitrogen compounds	2840	2820	0.992958
	Cocamidopropyl betaine	Nitrogen compounds	182000	171000	0.93956
	Carbachol	Nitrogen compounds	13600	11900	0.875
	N-Caffeoylspermidine	Nitrogen compounds	5330	4120	0.772983
C00747	Pyridine	Nitrogen compounds	71500	42900	0.6
	N-Acetyltryptamine	Nitrogen compounds	2020000	1110000	0.549505
	Feruloyl putrescine O-hexoside	Nitrogen compounds	271000	130000	0.479705
C00750	Spermine	Nitrogen compounds	2120000	889000	0.41934
C02938	3-Indoleacetonitrile	Nitrogen compounds	50300	19400	0.385686
C03375	Norspermidine	Nitrogen compounds	146000	53200	0.364384
C00253	Nicotinic acid	Nitrogen compounds	71400	25600	0.358543
	N-Benzoyltryptamine	Nitrogen compounds	101000	36100	0.357426
C00588	Phosphorylcholine	Nitrogen compounds	412000	139000	0.337379
C00588	O-Phosphocholine	Nitrogen compounds	4270000	1410000	0.330211
C05659	5-Methoxytryptamine	Nitrogen compounds	272000	88900	0.326838
C00114	Choline	Nitrogen compounds	14600000	4190000	0.286986
	Indoxyl sulfate	Nitrogen compounds	40800	10100	0.247549
C00847	4-Pyridoxic acid	Nitrogen compounds	454	100	0.220264
C05660	Methoxy indoleacetic acid	Nitrogen compounds	77200	14300	0.185233
C08309	5-Methoxy-N,N-dimethyltryptamine	Nitrogen compounds	70200	12900	0.183761
C00250	Pyridoxal	Nitrogen compounds	11100	1540	0.138739
	2-(5-hydroxy-1H-indol-3-yl)acetic acid	Nitrogen compounds	111000	15200	0.136937
C00847	4-Pyridoxate	Nitrogen compounds	25700	3240	0.12607
C00719	Betaine	Nitrogen compounds	32200000	3370000	0.104658
C00315	Spermidine	Nitrogen compounds	144000	11900	0.0826389
C01004	Trigonelline	Nitrogen compounds	365000	27300	0.0747945
	5-Methoxydimethyltryptamine	Nitrogen compounds	2780	100	0.0359712
	5-Methoxy-3-indoleaceate	Nitrogen compounds	124000	1090	0.00879032
C00933	Sinapine	Nitrogen compounds	24400	100	0.00409836
C00956	a-Aminoadipate	Organic acid	169000	329000	1.94675
C00180	Benzoic acid	Organic acid	18900	30700	1.62434
C00628	Gentisic acid	Organic acid	119000	184000	1.54622
C00245	Taurine	Organic acid	21500000	30000000	1.39535
	DL-Pipecolinic acid	Organic acid	563000	707000	1.25577
C05570	Ergothioneine	Organic acid	206000	243000	1.17961
C07185	Valproic acid	Organic acid	18100	21000	1.16022
C06104	Adipate	Organic acid	57300	65000	1.13438
	b - alanine - lysine	Organic acid	44900	48700	1.08463
C00628	2,5-dihydroxy benzoic acid	Organic acid	873000	930000	1.06529
	Mefenamate	Organic acid	46000	45800	0.995652
	Azelaate	Organic acid	76300	55200	0.72346
C01983,C01984	Mandelic acid	Organic acid	5850	3870	0.661538
C00632	3-Hydroxyanthranilic acid	Organic acid	21700	12800	0.589862
	Tiglate	Organic acid	237000	129000	0.544304
	o-Anisic acid	Organic acid	429000	228000	0.531469
C02504	2-Isopropylmalate	Organic acid	13600	5230	0.384559
C07527	Benzocaine	Organic acid	157000	52400	0.333758
	D-Pantothenic acid	Organic acid	2310000	766000	0.331602
C01207	Hydroxyphenyllactic acid	Organic acid	1300	427	0.328462
C03665	2-Aminoisobutyric acid	Organic acid	7530000	2120000	0.281541
C00149, C00711	Malate	Organic acid	2030000	539000	0.265517
C01035	4-Guanidinobutanoate	Organic acid	80200	15100	0.188279
C00430	5-Aminolevulinate	Organic acid	2080000	391000	0.187981
	2-Aminobenzoic acid	Organic acid	210000	36200	0.172381
C00815	(-)-Citramalic acid	Organic acid	424000	40000	0.0943396
C00149	L-Malic acid	Organic acid	69300	5870	0.0847042
C01984	(S)-Mandelate	Organic acid	1300000	100	7.69231e-05
	Quercetin-3-beta-O-galactoside	Phenols	20600	25900	1.25728
C00774	Phloretin	Phenols	1100000	1270000	1.15455
	O-methylnaringenin C-pentoside	Phenols	41500	39900	0.961446
	3,7-Dihydroxy-3',4'-dimethoxyflavone	Phenols	4610000	3970000	0.861171
	DL-3,4-Dihydroxymandelic acid	Phenols	98500	63500	0.64467
C00423	trans-Cinnamic acid	Phenols	32800	16400	0.5
C01772	2-Hydroxycinnamic acid	Phenols	323000	148000	0.458204
	5-Methoxyflavanone	Phenols	37900	16200	0.427441
	3,4-Dimethoxycinnamic acid	Phenols	239000	64900	0.271548
C01477	Apigenin	Phenols	25600	5140	0.200781
	Di-C,C-hexosyl-chrysoeriol	Phenols	30300	3440	0.113531
	3,4-Dihydroxyhydrocinnamic acid	Phenols	7760	755	0.0972938
C10208	Daidzein	Phenols	19100	1480	0.0774869
C00811	4-Hydroxycinnamic acid	Phenols	11400	100	0.00877193
C06563	Genistein	Phenols	86200	3960	0.0459397
	Yohimbinic acid	Others	1230000	4460000	3.62602
	6a_Methylprednisolone	Others	2020	7190	3.55941
	3(2'-Chlorophenyl)-7-hydroxy-4-phenylcoumarin	Others	16100	47300	2.93789
C00388	Histamine	Others	57200	146000	2.55245
C07166	Triethylenetetramine	Others	5740000	11600000	2.02091
	Benzophenone-2	Others	14400	26500	1.84028
C09305	Psoralen	Others	12400	22400	1.80645
	2,3-Diphosphoglyceric acid	Others	205000	364000	1.77561
C07371	Primidone	Others	33500	59400	1.77313
	Lycoperodine	Others	79700	140000	1.75659
	Tianshic acid	Others	20400	28500	1.39706
	10,11-trans-Dihydroxy-10,11-dihydrocarbamazepine	Others	59000	81500	1.38136
C09712	Polygodial	Others	107000	142000	1.3271
C00408	Pipecolinic acid	Others	1740000	2150000	1.23563
C00791	Creatinine	Others	64700	76200	1.17774
C00755	Vanillin	Others	11000	12800	1.16364
	g-Guanidinobutyrate	Others	45000	50900	1.13111
	Dodecyl (dimethyl) amine oxide	Others	294000	321000	1.09184
	DL-alpha,epsilon-Diaminopimelic acid	Others	27100	28500	1.05166
C02713	N-Acetylmuramate	Others	221000	227000	1.02715
	1-(2,3-dibenzimidazol-2-ylpropyl)-2-methoxybenzene	Others	100	100	1
C07435	Phenoxybenzamine	Others	100	100	1
C01691	Diflunisal	Others	23900	22200	0.92887
	Rhodomyrtone	Others	4120000	3650000	0.885922
	Oryzalexin C	Others	99900	85500	0.855856
C08898	Diosgenin	Others	7780000	6590000	0.847044
	Norfenfluramine	Others	523000	400000	0.764818
C11110	Imidacloprid	Others	6450	4880	0.756589
C05682	Phosphonoacetate	Others	33700	25000	0.74184
	2-[6-(diethylamino)purin-9-yl]-5-(hydroxymethyl)oxolane-3,4-diol	Others	3010	2230	0.740864
C08497	Trans-2-Hexenal	Others	2520000	1640000	0.650794
C11129	Isatin	Others	438000	279000	0.636986
C00120	Biotin	Others	17600	11200	0.636364
C00632	3-Hydroxyanthranilic acid	Others	10800	6790	0.628704
C19432	Hycanthone	Others	3640	2110	0.57967
	MNA-hex-p	Others	25700	14500	0.564202
C01517	Naproxen	Others	1470000	803000	0.546259
C09264	Esculin	Others	265000	141000	0.532075
C00130	Inosine 5'-monophosphate	Others	53000	27700	0.522642
	Cocarboxylase	Others	17800	8970	0.503933
	L-Methionine sulfone	Others	1160000	577000	0.497414
C07565	N-Phenylacetamide	Others	98000	46100	0.470408
	Syringaldehyde	Others	129000	58900	0.456589
	Nw-Acetylhistamine	Others	45100	20400	0.452328
	4, 7, 10-Trioxa-1,13-tridecanediamine	Others	10000000	4430000	0.443
C02421	Isonicotinamide	Others	11500000	4890000	0.425217
C06804	Paracetamol	Others	32800	13600	0.414634
	Ethyl 3,4-dihydroxybenzoate	Others	85100	34000	0.39953
C00255	Riboflavin	Others	13000	5050	0.388462
C01950	Picolinamide	Others	3990000	1470000	0.368421
C00074	Phosphoenolpyruvate	Others	28100	10200	0.362989
C01784	Benzamidine	Others	1730000	595000	0.343931
C00864	Pantothenic acid	Others	3030000	959000	0.316502
C02734	Phenyl phosphate	Others	336000	105000	0.3125
C07146	Metaraminol	Others	188000	56600	0.301064
C00864	Pantothenate	Others	4960000	1480000	0.298387
C01864	8-Methoxypsoralen	Others	38900	10800	0.277635
C00860	Histidinol	Others	4110000	1130000	0.274939
C01718	Kynurenine	Others	496000	129000	0.260081
C00270	N-acetylneuraminic acid	Others	25000	6270	0.2508
C08996	Biflorin	Others	24000	5970	0.24875
C00255	Vitamin B2	Others	329000	81300	0.247112
C11004	2,6-Dimethylaniline	Others	87400	21100	0.241419
	7-chloro-4-methyl-2-oxochromen-6-yl propanoate	Others	18200	4150	0.228022
C00061	Flavin Mononucleotide	Others	14500	3010	0.207586
C03758	Hydroxyphenethylamine	Others	41600	8390	0.201683
	Nicotinic acid derivatives	Others	5550000	1030000	0.185586
C00788	Epinephrine	Others	20700	3560	0.171981
C00449	L-Saccharopine	Others	411000	68400	0.166423
	1-Adamantanamine	Others	54300	7590	0.139779
	Dimethenamid-OXA	Others	13300	1530	0.115038
C01470	Acacetin	Others	24800	2760	0.11129
C08432	Crotonoside	Others	8250000	741000	0.0898182
C06314	Lipoxin A4	Others	448000	26100	0.0582589
C03410	N-Glycolylneuraminate	Others	22300	934	0.0418834
	E-3,4,5'-Trihydroxy-3'-glucopyranosylstilbene	Others	32000	720	0.0225
C00378	Thiamine	Others	4540	100	0.0220264
	Digitoxigenine	Others	94400	2040	0.0216102
C00547	Noradrenaline	Others	5040	100	0.0198413
C09815	Benzamide	Others	5070	100	0.0197239
C02283	Enoxolone	Others	324000	3450	0.0106481

## Sheet: VAT-diff
Metabolites significantly changed in visceral adipose tissue			Content(Value)				Log2Value (Heatmap)
KEGG_ID	Biochemical_Name	Classe	Control	DGLHD	Fold change		Control	DGLHD
C05951	Leukotrienes D4	Lipid	100	540	5.4		6.64386	9.07682
C08364	Punicic acid	Lipid	729000	1470000	2.01646		19.4756	20.4874
	9-Hydroxy-(10E,12Z,15Z)-octadecatrienoic acid	Lipid	198000	335000	1.69192		17.5951	18.3538
C00410	Progesterone	Lipid	8480	13700	1.61557		13.0498	13.7419
C00670	sn-Glycero-3-phosphocholine	Lipid	5130000	8140000	1.58674		22.2905	22.9566
	(9Z, 12Z)-Octadecadienoate	Lipid	3750	5890	1.57067		11.8727	12.5241
	15-hydroxy eicosatetraenoic acid	Lipid	765000	347000	0.453595		19.5451	18.4046
	12-Hydroxy eicosatetraenoic acid	Lipid	914000	393000	0.429978		19.8018	18.5842
	Llysophosphatidylcholine(1-acyl 18:3)	Lipid	9700000	3840000	0.395876		23.2096	21.8727
C00487	Carnitine	Lipid	10500	4080	0.388571		13.3581	11.9944
	20-Hydroxy Docosahexaenoic acid	Lipid	1000	373	0.373		9.96578	8.54303
	9,10-Dihydroxy octadecenoic acid	Lipid	126000	46400	0.368254		16.9431	15.5018
C00187	Cholesterol	Lipid	44600	16000	0.358744		15.4448	13.9658
C01601	Pelargonic acid	Lipid	1570000	507000	0.32293		20.5823	18.9516
C01571	Capric acid	Lipid	2360000	659000	0.279237		21.1704	19.3299
	Lysophosphatidylcholine (1-acyl 18:2)	Lipid	7700000	2080000	0.27013		22.8764	20.9882
C02165	Leukotrienes B4	Lipid	1360	257	0.188971		10.4094	8.00562
	13-hydroperoxy octadecatrienoic acid	Lipid	765	100	0.130719		9.57932	6.64386
	Lysophosphatidylcholine(1-acyl 16:1)	Lipid	20500000	2420000	0.118049		24.2891	21.2066
C00696	Prostaglandin D2	Lipid	1820000	99200	0.0545055		20.7955	16.5981
C00639	Prostaglandin F2a	Lipid	3810	100	0.0262467		11.8956	6.64386
	20-Hydroxy Leukotrienes B4	Lipid	5640	100	0.0177305		12.4615	6.64386
C05957	Prostaglandin J2	Lipid	815000	8900	0.0109202		19.6364	13.1196
C00695	Cholate	Lipid	13400	100	0.00746269		13.7099	6.64386
C00064	L-Glutamine	Amino acid	240000	1620000	6.75		17.8727	20.6276
C00152	L-Asparagine	Amino acid	195000	1060000	5.4359		17.5731	20.0156
C00780	Serotonin	Amino acid	8670	41400	4.77509		13.0818	15.3373
C00542	Cystathionine	Amino acid	8400	27400	3.2619		13.0362	14.7419
C18623	Phenylglycine	Amino acid	9100	29500	3.24176		13.1517	14.8484
C00768	Histidine	Amino acid	143000	450000	3.14685		17.1257	18.7796
C01026	Dimethylglycine	Amino acid	3700000	11500000	3.10811		21.8191	23.4551
	S-(5'-Adenosyl)-L-methionine	Amino acid	40400	115000	2.84653		15.3021	16.8113
	3-Iodotyrosine	Amino acid	31900	81500	2.55486		14.9613	16.3145
C00065	L-Serine	Amino acid	1190000	3010000	2.52941		20.1825	21.5213
	Homoproline	Amino acid	1490	3300	2.21477		10.5411	11.6883
C00047	L-Lysine	Amino acid	4530000	9440000	2.08389		22.1111	23.1704
	D-3-Methylhistidine	Amino acid	8770	17800	2.02965		13.0984	14.1196
C20843	Gamma-glutamyl Glutamine	Amino acid	22900	45700	1.99563		14.4831	15.4799
C00819	D-Glutamine	Amino acid	48000	87000	1.8125		15.5507	16.4087
C00041	L-Alanine	Amino acid	2100000	3790000	1.80476		21.002	21.8538
C00386	Carnosine	Amino acid	23500	42200	1.79574		14.5204	15.365
	Tiglylglycine	Amino acid	31200	50600	1.62179		14.9293	15.6268
C00188	L-Threonine	Amino acid	1400000	2260000	1.61429		20.417	21.1079
C00183	L-Valine	Amino acid	20400000	9450000	0.463235		24.2821	23.1719
C00082	L-Tyrosine	Amino acid	9290000	4190000	0.451023		23.1472	21.9985
C00148	L-Proline	Amino acid	13300000	5970000	0.448872		23.6649	22.5093
C02727	N6-Acetyl-L-lysine	Amino acid	63300	28200	0.445498		15.9499	14.7834
	o-Hydroxyhippurate	Amino acid	6170	2570	0.416532		12.5911	11.3276
C19716	N-Hydroxy-L-tryptophan	Amino acid	10100	3970	0.393069		13.3021	11.9549
C00643	Oxitriptan	Amino acid	21500	7920	0.368372		14.392	12.9513
C00407	L-Isoleucine	Amino acid	4670000	1720000	0.368308		22.155	20.714
C01933	L-Norleucine	Amino acid	537000	196000	0.364991		19.0346	17.5805
C02261	D-2-Aminobutyrate	Amino acid	18000000	6470000	0.359444		24.1015	22.6253
C03519	N-Acetyl-L-phenylalanine	Amino acid	31300	11200	0.357827		14.9339	13.4512
C00049	L-Aspartic acid	Amino acid	8900000	3110000	0.349438		23.0854	21.5685
C00073	L-Methionine	Amino acid	3070000	1050000	0.34202		21.5498	20.002
C10164	Picolinic acid	Amino acid	2620	880	0.335878		11.3554	9.78136
C00736	Cysteine	Amino acid	12600	3720	0.295238		13.6211	11.8611
C02470	Xanthurenic acid	Amino acid	35600	9970	0.280056		15.1196	13.2834
C00328	L-Kynurenine	Amino acid	130000	35100	0.27		16.9882	15.0992
C02712	N-Acetylmethionine	Amino acid	34800	7460	0.214368		15.0868	12.865
	N-Acetylglutamate	Amino acid	21600	4410	0.204167		14.3987	12.1066
C01817	L-Homocystine	Amino acid	14500	2930	0.202069		13.8238	11.5167
C00078	L-Tryptophan	Amino acid	6830000	1380000	0.20205		22.7035	20.3962
	N-Acetyl-DL-glutamic acid	Amino acid	115000	22900	0.19913		16.8113	14.4831
	1-Amino-1-cyclopentanecarboxylic acid	Amino acid	1260000	243000	0.192857		20.265	17.8906
C00082,C00585	tyrosine	Amino acid	67900	12500	0.184094		16.0511	13.6096
C01817	Homocystine	Amino acid	402000	49900	0.124129		18.6168	15.6068
C00021	S-Adenosylhomocysteine	Amino acid	276000	33100	0.119928		18.0743	15.0145
C00300	Creatine	Amino acid	24600000	2790000	0.113415		24.5522	21.4118
C00449	Saccharopine	Amino acid	317000	34400	0.108517		18.2741	15.0701
C03406	Argininosuccinate	Amino acid	70600	7090	0.100425		16.1074	12.7916
C02486	Beta-Leucine	Amino acid	1090000	102000	0.093578		20.0559	16.6382
C02710	N-Acetyl-L-leucine	Amino acid	12100	762	0.0629752		13.5627	9.57365
	Lysine butyrate	Amino acid	4160000	244000	0.0586538		21.9882	17.8965
C01042	N-Acetyl-L-aspartic acid	Amino acid	77300	3510	0.0454075		16.2382	11.7773
C00051	Glutathione	Amino acid	1990000	32100	0.0161307		20.9243	14.9703
C00152	L-Asparagine	Amino acid	10600	100	0.00943396		13.3718	6.64386
C00089	Sucrose	Carbohydrate	5980	75300	12.592		12.5459	16.2004
C00031	D-Glucose	Carbohydrate	292000	138000	0.472603		18.1556	17.0743
C00329	Glucosamine	Carbohydrate	2050000	927000	0.452195		20.9672	19.8222
C00085,C05345	Fructose 6-phosphate	Carbohydrate	6400000	2810000	0.439063		22.6096	21.4221
	Fructose 1,6-diphosphate	Carbohydrate	4410000	1500000	0.340136		22.0723	20.5165
C01796	D-(-)-Erythrose	Carbohydrate	115000	38400	0.333913		16.8113	15.2288
C00092	Glucose 6-phosphate	Carbohydrate	18700	5970	0.319251		14.1908	12.5435
C00257	Gluconic acid	Carbohydrate	675000	144000	0.213333		19.3645	17.1357
	5-Ethyl-2'-deoxyuridine	Carbohydrate	42800	5190	0.121262		15.3853	12.3415
	Uridine 5'-diphospho-N-acetylgalactosamine	Carbohydrate	350000	9480	0.0270857		18.417	13.2107
	Glucose 1-phosphate(2)	Carbohydrate	38000	898	0.0236316		15.2137	9.81057
C05841	Nicotinate ribonucleoside	Carbohydrate	18900	100	0.00529101		14.2061	6.64386
	Orotidine 5'-monophosphate	Nucleotide	12600	26400	2.09524		13.6211	14.6883
	N2-Isobutyryl-2'-deoxyguanosine	Nucleotide	10200	4710	0.461765		13.3163	12.2015
	Succinyladenosine	Nucleotide	1440000	627000	0.435417		20.4576	19.2581
C04037	Galacturonate 1-phosphate	Nucleotide	1840	732	0.397826		10.8455	9.5157
C15587	Purine	Nucleotide	565000	215000	0.380531		19.1079	17.714
C01762	Xanthosine	Nucleotide	4560000	1720000	0.377193		22.1206	20.714
C16614	6-Methylmercaptopurine	Nucleotide	4500000	1650000	0.366667		22.1015	20.654
C02380	6-Mercaptopurine	Nucleotide	361000	128000	0.354571		18.4616	16.9658
C00299	Uridine	Nucleotide	4520000	1330000	0.294248		22.1079	20.343
	3'-Dephosphocoenzyme A	Nucleotide	5140	1450	0.282101		12.3276	10.5018
	2'-Deoxyadenosine monohydrate	Nucleotide	198000	49700	0.25101		17.5951	15.601
C00360	2'-Deoxyadenosine-5'-monophosphate	Nucleotide	25200	5830	0.231349		14.6211	12.5093
C00475	Cytidine	Nucleotide	4440000	996000	0.224324		22.0821	19.9258
C00242	Guanine	Nucleotide	31900	6920	0.216928		14.9613	12.7566
	Guanine derivative	Nucleotide	31600	6850	0.216772		14.9476	12.7419
C00559	2'-Deoxyadenosine	Nucleotide	7900	1520	0.192405		12.9476	10.5699
C00262	Hypoxanthine	Nucleotide	3190000	541000	0.169592		21.6051	19.0453
	5-Methylcytidine	Nucleotide	43700	6960	0.159268		15.4153	12.7649
	Etamiphylline	Nucleotide	1720000	251000	0.14593		20.714	17.9373
C00294	Inosine	Nucleotide	39500000	5000000	0.126582		25.2353	22.2535
	2'-Deoxyinosine-5'-monophosphate	Nucleotide	3640000	389000	0.106868		21.7955	18.5694
C00212	Adenosine	Nucleotide	6120000	598000	0.0977124		22.5451	19.1898
C00006	beta-Nicotinamide adenine dinucleotide	Nucleotide	55700	4880	0.0876122		15.7654	12.2527
C00387	Guanosine	Nucleotide	6800000	568000	0.0835294		22.6971	19.1155
	Threonyl carbamoyl adenosine	Nucleotide	89300	7180	0.0804031		16.4464	12.8098
C03794	Adenylosuccinate	Nucleotide	1430	100	0.0699301		10.4818	6.64386
	N2, N2-Dimethylguanosine	Nucleotide	275000	11200	0.0407273		18.0691	13.4512
	Uridine diphosphategalactose	Nucleotide	2400000	60000	0.025		21.1946	15.8727
	N2, N2-Dimethyguanosine	Nucleotide	228000	5470	0.0239912		17.7987	12.4173
	Adenosine 5'-diphospho-glucose	Nucleotide	6650	100	0.0150376		12.6991	6.64386
	Nicotinic acid mono nucleotide	Nucleotide	88900	832	0.00935883		16.4399	9.70044
C02242	7-Methylguanine	Nucleotide	13600	1640	0.120588		13.7313	10.6795
	1H-indole-3-carboxylic acid	Nitrogen compounds	184000	399000	2.16848		17.4893	18.606
	Etamiphylline	Nitrogen compounds	95000	179000	1.88421		16.5356	17.4496
	Feruloyl putrescine O-hexoside	Nitrogen compounds	271000	130000	0.479705		18.0479	16.9882
C00750	Spermine	Nitrogen compounds	2120000	889000	0.41934		21.0156	19.7618
C02938	3-Indoleacetonitrile	Nitrogen compounds	50300	19400	0.385686		15.6183	14.2438
C03375	Norspermidine	Nitrogen compounds	146000	53200	0.364384		17.1556	15.6991
C00253	Nicotinic acid	Nitrogen compounds	71400	25600	0.358543		16.1236	14.6439
	N-Benzoyltryptamine	Nitrogen compounds	101000	36100	0.357426		16.624	15.1397
C00588	Phosphorylcholine	Nitrogen compounds	412000	139000	0.337379		18.6523	17.0847
C00588	O-Phosphocholine	Nitrogen compounds	4270000	1410000	0.330211		22.0258	20.4273
C05659	5-Methoxytryptamine	Nitrogen compounds	272000	88900	0.326838		18.0532	16.4399
C00114	Choline	Nitrogen compounds	14600000	4190000	0.286986		23.7995	21.9985
	Indoxyl sulfate	Nitrogen compounds	40800	10100	0.247549		15.3163	13.3021
C00847	4-Pyridoxic acid	Nitrogen compounds	454	100	0.220264		8.82655	6.64386
C05660	Methoxy indoleacetic acid	Nitrogen compounds	77200	14300	0.185233		16.2363	13.8037
C08309	5-Methoxy-N,N-dimethyltryptamine	Nitrogen compounds	70200	12900	0.183761		16.0992	13.6551
C00250	Pyridoxal	Nitrogen compounds	11100	1540	0.138739		13.4383	10.5887
	2-(5-hydroxy-1H-indol-3-yl)acetic acid	Nitrogen compounds	111000	15200	0.136937		16.7602	13.8918
C00847	4-Pyridoxate	Nitrogen compounds	25700	3240	0.12607		14.6495	11.6618
C00719	Betaine	Nitrogen compounds	32200000	3370000	0.104658		24.9406	21.6843
C00315	Spermidine	Nitrogen compounds	144000	11900	0.0826389		17.1357	13.5387
C01004	Trigonelline	Nitrogen compounds	365000	27300	0.0747945		18.4775	14.7366
	5-Methoxydimethyltryptamine	Nitrogen compounds	2780	100	0.0359712		11.4409	6.64386
	5-Methoxy-3-indoleaceate	Nitrogen compounds	124000	1090	0.00879032		16.92	10.0901
C00933	Sinapine	Nitrogen compounds	24400	100	0.00409836		14.5746	6.64386
C00956	a-Aminoadipate	Organic acid	169000	329000	1.94675		17.3667	18.3277
C00180	Benzoic acid	Organic acid	18900	30700	1.62434		14.2061	14.906
C00628	Gentisic acid	Organic acid	119000	184000	1.54622		16.8606	17.4893
C02504	2-Isopropylmalate	Organic acid	13600	5230	0.384559		13.7313	12.3526
C07527	Benzocaine	Organic acid	157000	52400	0.333758		17.2604	15.6773
	D-Pantothenic acid	Organic acid	2310000	766000	0.331602		21.1395	19.547
C01207	Hydroxyphenyllactic acid	Organic acid	1300	427	0.328462		10.3443	8.73809
C03665	2-Aminoisobutyric acid	Organic acid	7530000	2120000	0.281541		22.8442	21.0156
C00149, C00711	Malate	Organic acid	2030000	539000	0.265517		20.953	19.0399
C01035	4-Guanidinobutanoate	Organic acid	80200	15100	0.188279		16.2913	13.8823
C00430	5-Aminolevulinate	Organic acid	2080000	391000	0.187981		20.9882	18.5768
	2-Aminobenzoic acid	Organic acid	210000	36200	0.172381		17.68	15.1437
C00815	(-)-Citramalic acid	Organic acid	424000	40000	0.0943396		18.6937	15.2877
C00149	L-Malic acid	Organic acid	69300	5870	0.0847042		16.0806	12.5191
C01984	(S)-Mandelate	Organic acid	1300000	100	7.69231e-05		20.3101	6.64386
C00423	trans-Cinnamic acid	Phenols	32800	16400	0.5		15.0014	14.0014
C01772	2-Hydroxycinnamic acid	Phenols	323000	148000	0.458204		18.3012	17.1752
	5-Methoxyflavanone	Phenols	37900	16200	0.427441		15.2099	13.9837
	3,4-Dimethoxycinnamic acid	Phenols	239000	64900	0.271548		17.8667	15.9859
C01477	Apigenin	Phenols	25600	5140	0.200781		14.6439	12.3276
	Di-C,C-hexosyl-chrysoeriol	Phenols	30300	3440	0.113531		14.887	11.7482
	3,4-Dihydroxyhydrocinnamic acid	Phenols	7760	755	0.0972938		12.9218	9.56033
C10208	Daidzein	Phenols	19100	1480	0.0774869		14.2213	10.5314
C00811	4-Hydroxycinnamic acid	Phenols	11400	100	0.00877193		13.4767	6.64386
C06563	Genistein	Phenols	86200	3960	0.0459397		16.3954	11.9513
	Yohimbinic acid	Others	1230000	4460000	3.62602		20.2302	22.0886
	6a_Methylprednisolone	Others	2020	7190	3.55941		10.9801	12.8118
	3(2'-Chlorophenyl)-7-hydroxy-4-phenylcoumarin	Others	16100	47300	2.93789		13.9748	15.5296
C00388	Histamine	Others	57200	146000	2.55245		15.8037	17.1556
C07166	Triethylenetetramine	Others	5740000	11600000	2.02091		22.4526	23.4676
	Benzophenone-2	Others	14400	26500	1.84028		13.8138	14.6937
C09305	Psoralen	Others	12400	22400	1.80645		13.5981	14.4512
	2,3-Diphosphoglyceric acid	Others	205000	364000	1.77561		17.6453	18.4736
C07371	Primidone	Others	33500	59400	1.77313		15.0319	15.8582
	Lycoperodine	Others	79700	140000	1.75659		16.2823	17.0951
	Cocarboxylase	Others	17800	8970	0.503933		14.1196	13.1309
	L-Methionine sulfone	Others	1160000	577000	0.497414		20.1457	19.1382
C07565	N-Phenylacetamide	Others	98000	46100	0.470408		16.5805	15.4925
	Syringaldehyde	Others	129000	58900	0.456589		16.977	15.846
	Nw-Acetylhistamine	Others	45100	20400	0.452328		15.4608	14.3163
	4, 7, 10-Trioxa-1,13-tridecanediamine	Others	10000000	4430000	0.443		23.2535	22.0789
C02421	Isonicotinamide	Others	11500000	4890000	0.425217		23.4551	22.2214
C06804	Paracetamol	Others	32800	13600	0.414634		15.0014	13.7313
	Ethyl 3,4-dihydroxybenzoate	Others	85100	34000	0.39953		16.3769	15.0532
C00255	Riboflavin	Others	13000	5050	0.388462		13.6662	12.3021
C01950	Picolinamide	Others	3990000	1470000	0.368421		21.928	20.4874
C00074	Phosphoenolpyruvate	Others	28100	10200	0.362989		14.7783	13.3163
C01784	Benzamidine	Others	1730000	595000	0.343931		20.7223	19.1825
C00864	Pantothenic acid	Others	3030000	959000	0.316502		21.5309	19.8712
C02734	Phenyl phosphate	Others	336000	105000	0.3125		18.3581	16.68
C07146	Metaraminol	Others	188000	56600	0.301064		17.5204	15.7885
C00864	Pantothenate	Others	4960000	1480000	0.298387		22.2419	20.4972
C01864	8-Methoxypsoralen	Others	38900	10800	0.277635		15.2475	13.3987
C00860	Histidinol	Others	4110000	1130000	0.274939		21.9707	20.1079
C01718	Kynurenine	Others	496000	129000	0.260081		18.92	16.977
C00270	N-acetylneuraminic acid	Others	25000	6270	0.2508		14.6096	12.6142
C08996	Biflorin	Others	24000	5970	0.24875		14.5507	12.5435
C00255	Vitamin B2	Others	329000	81300	0.247112		18.3277	16.311
C11004	2,6-Dimethylaniline	Others	87400	21100	0.241419		16.4153	14.365
	7-chloro-4-methyl-2-oxochromen-6-yl propanoate	Others	18200	4150	0.228022		14.1517	12.0189
C00061	Flavin Mononucleotide	Others	14500	3010	0.207586		13.8238	11.5555
C03758	Hydroxyphenethylamine	Others	41600	8390	0.201683		15.3443	13.0345
	Nicotinic acid derivatives	Others	5550000	1030000	0.185586		22.4041	19.9742
C00788	Epinephrine	Others	20700	3560	0.171981		14.3373	11.7977
C00449	L-Saccharopine	Others	411000	68400	0.166423		18.6488	16.0617
	1-Adamantanamine	Others	54300	7590	0.139779		15.7287	12.8899
	Dimethenamid-OXA	Others	13300	1530	0.115038		13.6991	10.5793
C01470	Acacetin	Others	24800	2760	0.11129		14.5981	11.4305
C08432	Crotonoside	Others	8250000	741000	0.0898182		22.976	19.4991
C06314	Lipoxin A4	Others	448000	26100	0.0582589		18.7731	14.6718
C03410	N-Glycolylneuraminate	Others	22300	934	0.0418834		14.4448	9.86728
	E-3,4,5'-Trihydroxy-3'-glucopyranosylstilbene	Others	32000	720	0.0225		14.9658	9.49185
C00378	Thiamine	Others	4540	100	0.0220264		12.1485	6.64386
	Digitoxigenine	Others	94400	2040	0.0216102		16.5265	10.9944
C00547	Noradrenaline	Others	5040	100	0.0198413		12.2992	6.64386
C09815	Benzamide	Others	5070	100	0.0197239		12.3078	6.64386
C02283	Enoxolone	Others	324000	3450	0.0106481		18.3056	11.7524

## Sheet: Liver
Metabolites in liver			Content(Value)
KEGG_ID	Biochemical_Name	Classe	Control	DGLHD	Fold change
	13-Hydroxy octadecatrienoic acid	Lipid	1480	7300	4.93243
C02165	Leucotriene B4	Lipid	5760	22500	3.90625
C05951	Leucotriene D4	Lipid	18600	64700	3.47849
C05957	Prostaglandin J2	Lipid	275000	925000	3.36364
	13-Hydroperoxy octadecatrienoic acid	Lipid	12100	22500	1.8595
	9-Hydroxy-(10E,12Z,15Z)-octadecatrienoic acid	Lipid	16500	29400	1.78182
	8,15-Dihydroxy eicosatetraenoic acid	Lipid	45700	80100	1.75274
	5S,12R-dihydroxy-6Z,8E,10E,14Z,17Z-eicosapentaenoic acid	Lipid	59800	100000	1.67224
C00410	Progesterone	Lipid	23200	35700	1.53879
	20-Hydroxy Leucotriene B4	Lipid	70700	85600	1.21075
C05963	Thromboxane B2	Lipid	5980	7240	1.2107
C02140	Corticosterone	Lipid	35300	40100	1.13598
C00836	Dihydrosphingosine	Lipid	21700	24300	1.11982
C05122	Taurocholate	Lipid	32300	35600	1.10217
C01571	Capric acid	Lipid	1520000	1670000	1.09868
C12145	4-Hydroxysphinganine	Lipid	47900000	51900000	1.08351
	9,10-Dihydroxy octadecenoic acid	Lipid	95000	101000	1.06316
C08364	Punicic acid	Lipid	120000	116000	0.966667
C03990	Lithocholic acid	Lipid	36700	34400	0.93733
	Lysophosphatidylcholine (1-acyl 16:0)	Lipid	105000000	95600000	0.910476
	12,13-EODE	Lipid	368000	331000	0.899457
	Llysophosphatidylcholine(1-acyl 18:3)	Lipid	5730000	5110000	0.891798
C00696	Prostaglandin D2	Lipid	2230	1950	0.874439
	12-Hydroxy eicosatetraenoic acid	Lipid	159000	133000	0.836478
C00695	Cholate	Lipid	72100	59300	0.822469
C00670	sn-Glycero-3-phosphocholine	Lipid	17100000	14000000	0.818713
	15-hydroxy eicosatetraenoic acid	Lipid	117000	90300	0.771795
C01601	Pelargonic acid	Lipid	1050000	779000	0.741905
C13154	Dehydrocholic acid	Lipid	120000	81400	0.678333
	20-Hydroxy Docosahexaenoic acid	Lipid	80800	50000	0.618812
	Lysophosphatidylcholine(1-acyl 16:1)	Lipid	26600000	14800000	0.556391
C00487	Carnitine	Lipid	20900	11500	0.550239
	(9Z, 12Z)-Octadecadienoate	Lipid	109000	57900	0.531193
	Lysophosphatidylcholine (1-acyl 18:2)	Lipid	14300000	6260000	0.437762
C00187	Cholesterol	Lipid	35300	14900	0.422096
C00639	Prostaglandin F2a	Lipid	55300	9830	0.177758
	S-Carboxymethylcysteine	Amino acid	2100	17700	8.42857
C03406	Argininosuccinate	Amino acid	8440	66400	7.8673
C00819	D-Glutamine	Amino acid	104000	270000	2.59615
C02712	N-Acetylmethionine	Amino acid	66900	125000	1.86846
C01586	Hippuric acid	Amino acid	11600	21100	1.81897
	Tiglylglycine	Amino acid	19900	35300	1.77387
C00328	L-Kynurenine	Amino acid	299000	478000	1.59866
C00064	L-Glutamine	Amino acid	2960000	4710000	1.59122
	beta-Homothreonine	Amino acid	1280000	2020000	1.57812
	3-Iodotyrosine	Amino acid	86700	130000	1.49942
C01026	Dimethylglycine	Amino acid	5720000	6840000	1.1958
	Lysine butyrate	Amino acid	793000	941000	1.18663
C00542	Cystathionine	Amino acid	155000	183000	1.18065
	o-Hydroxyhippurate	Amino acid	50900	59600	1.17092
C00079	L-Phenylalanine	Amino acid	32500000	38000000	1.16923
C02057	Phenylalanine	Amino acid	28900000	33600000	1.16263
C00041	L-Alanine	Amino acid	5070000	5790000	1.14201
C01817	L-Homocystine	Amino acid	47700	54400	1.14046
C05519,C12317	allo-Threonine	Amino acid	2710000	3090000	1.14022
C00408	Pipecolic acid	Amino acid	796000	891000	1.11935
	S-(5'-Adenosyl)-L-methionine	Amino acid	209000	233000	1.11483
C19716	N-Hydroxy-L-tryptophan	Amino acid	27800	30900	1.11151
C00073	L-Methionine	Amino acid	7720000	8560000	1.10881
	L-Pipecolic acid	Amino acid	78500	86400	1.10064
C00302	Glutamic acid	Amino acid	15700000	17100000	1.08917
C00979	O-Acetyl-L-serine	Amino acid	16100000	17300000	1.07453
C01602	Ornithine	Amino acid	7170000	7600000	1.05997
C00062	L-Arginine	Amino acid	280000	296000	1.05714
	3-(2-Naphthyl)-D-alanine	Amino acid	72300	75500	1.04426
C00768	Histidine	Amino acid	1590000	1660000	1.04403
C00736	Cysteine	Amino acid	34700	36100	1.04035
C00152	L-Asparagine	Amino acid	28700	29800	1.03833
	D-3-Methylhistidine	Amino acid	34000	35100	1.03235
	Homo-L-arginine	Amino acid	212000	217000	1.02358
C00047	L-Lysine	Amino acid	23600000	23800000	1.00847
C00152	L-Asparagine	Amino acid	1450000	1460000	1.0069
C00183	L-Valine	Amino acid	54400000	54500000	1.00184
C07997	Eflornithine	Amino acid	388000	387000	0.997423
C00051	Glutathione	Amino acid	6300000	6270000	0.995238
C00884	Homocarnosine	Amino acid	13800	13700	0.992754
C02470	Xanthurenic acid	Amino acid	105000	104000	0.990476
C00135	L-Histidine	Amino acid	11400000	11100000	0.973684
C00082	L-Tyrosine	Amino acid	22400000	21800000	0.973214
	Homoproline	Amino acid	67300	64600	0.959881
	L-beta-Homotryptophan	Amino acid	677000	641000	0.946824
C02155	Glycyl-L-leucine	Amino acid	35500	33500	0.943662
C00643	Oxitriptan	Amino acid	55000	50500	0.918182
C00049	L-Aspartic acid	Amino acid	2930000	2670000	0.911263
C00123	L-Leucine	Amino acid	20300000	18300000	0.901478
C00148	L-Proline	Amino acid	32300000	28800000	0.891641
C10164	Picolinic acid	Amino acid	18200	16200	0.89011
C00148,C00763	Proline	Amino acid	1670000	1480000	0.886228
C00025	L-Glutamic acid	Amino acid	2290000	1960000	0.855895
C01879	Pyroglutamic acid	Amino acid	779000	659000	0.845956
C00021	S-Adenosylhomocysteine	Amino acid	2790000	2350000	0.842294
C00327	Citrulline	Amino acid	216000	180000	0.833333
C03283	2,4-Diaminobutyrate	Amino acid	263000	219000	0.8327
C00188	L-Threonine	Amino acid	3960000	3200000	0.808081
	N-Acetyl-DL-glutamic acid	Amino acid	646000	517000	0.80031
	3-Chloro-L-tyrosine	Amino acid	73100	58500	0.800274
C02261	D-2-Aminobutyrate	Amino acid	12400000	9880000	0.796774
C00065	L-Serine	Amino acid	1990000	1570000	0.788945
	1-Amino-1-cyclopentanecarboxylic acid	Amino acid	1550000	1220000	0.787097
C00078	L-Tryptophan	Amino acid	26500000	20800000	0.784906
C00449	Saccharopine	Amino acid	575000	449000	0.78087
C20843	Gamma-glutamyl Glutamine	Amino acid	337000	259000	0.768546
C01026	N,N-Dimethylglycine	Amino acid	72000	55100	0.765278
C01817	Homocystine	Amino acid	853000	652000	0.764361
	a-Methylserine	Amino acid	231000	174000	0.753247
	L-Tryptamine	Amino acid	33200	25000	0.753012
C01042	N-Acetyl-L-aspartic acid	Amino acid	5530	4160	0.75226
C02486	Beta-Leucine	Amino acid	90200	67100	0.743902
C01933	L-Norleucine	Amino acid	1420000	1050000	0.739437
	Na,Na-Dimethylhistidine	Amino acid	577000	422000	0.731369
C00049,C00402	Aspartic acid	Amino acid	1510000	1100000	0.728477
C02710	N-Acetyl-L-leucine	Amino acid	32100	23100	0.719626
C00386	Carnosine	Amino acid	64700	45000	0.695518
C00355	3,4-Dihydroxy-L-phenylalanine	Amino acid	11900	8190	0.688235
C00780	Serotonin	Amino acid	24500	16200	0.661224
	4-Guanidinobutanoic acid	Amino acid	6560	4220	0.643293
C00082,C00585	tyrosine	Amino acid	51600	32500	0.629845
C01005,C02532	O-Phosphoserine	Amino acid	479000	282000	0.588727
C00300	Creatine	Amino acid	2490000	1430000	0.574297
C02727	N6-Acetyl-L-lysine	Amino acid	777000	412000	0.530245
C03519	N-Acetyl-L-phenylalanine	Amino acid	346000	172000	0.49711
C18623	Phenylglycine	Amino acid	103000	45700	0.443689
	N-Acetylglutamate	Amino acid	242000	89200	0.368595
	N-Acetylleucine	Amino acid	2750000	755000	0.274545
C00407	L-Isoleucine	Amino acid	9740000	1010000	0.103696
	D-(+)-Trehalose	Carbohydrate	5890	12400	2.10526
C00092	Glucose 6-phosphate	Carbohydrate	5020	8880	1.76892
	2-Propenyl (sinigrin)	Carbohydrate	34900	49100	1.40688
	5-Ethyl-2'-deoxyuridine	Carbohydrate	76900	108000	1.40442
C05841	Nicotinate ribonucleoside	Carbohydrate	61300	68400	1.11582
C00117	D-Ribose 5-phosphate	Carbohydrate	224000	239000	1.06696
C00085,C05345	Fructose 6-phosphate	Carbohydrate	5990000	6270000	1.04674
C01796	D-(-)-Erythrose	Carbohydrate	234000	236000	1.00855
C00329	Glucosamine	Carbohydrate	4350000	4120000	0.947126
C00644	Mannitol 1-phosphate	Carbohydrate	10500000	9650000	0.919048
C00257	Gluconic acid	Carbohydrate	5570000	4470000	0.802513
C12285	Sucralose	Carbohydrate	23600	18800	0.79661
C00089	Sucrose	Carbohydrate	3850000	2550000	0.662338
	Uridine 5'-diphospho-N-acetylgalactosamine	Carbohydrate	519000	339000	0.653179
	alpha-D-Glucose-1,6-diphosphate	Carbohydrate	3390000	2030000	0.59882
C00031	D-Glucose	Carbohydrate	944000	469000	0.496822
	Glucose 1-phosphate(2)	Carbohydrate	1500	728	0.485333
	Fructose 1,6-diphosphate	Carbohydrate	7770000	3660000	0.471042
C01835	Maltotriose	Carbohydrate	105000	35400	0.337143
C00387	Guanosine	Nucleotide	462000	3260000	7.05628
	Nicotinic acid mono nucleotide	Nucleotide	26900	91100	3.38662
	Uridine 5'-diphospho-D-glucose	Nucleotide	15100	47200	3.12583
C00008	Adenosine 5'-diphosphate	Nucleotide	15300	44200	2.88889
C00242	Guanine	Nucleotide	13900	36900	2.65468
	Guanine derivative	Nucleotide	46400	91200	1.96552
	Etamiphylline	Nucleotide	1800000	2630000	1.46111
	Orotidine 5'-monophosphate	Nucleotide	28100	40900	1.45552
	N2-Isobutyryl-2'-deoxyguanosine	Nucleotide	14100	20000	1.41844
	5-Methylcytidine	Nucleotide	127000	170000	1.33858
C00262	Hypoxanthine	Nucleotide	1870000	2340000	1.25134
C07599	Oxypurinol	Nucleotide	705000	879000	1.24681
	Threonyl carbamoyl adenosine	Nucleotide	42700	52100	1.22014
C00006	beta-Nicotinamide adenine dinucleotide	Nucleotide	126000	152000	1.20635
	N2, N2-Dimethyguanosine	Nucleotide	85100	102000	1.19859
	Adenosine 3',5'-cyclicmonophosphate	Nucleotide	291000	345000	1.18557
	2'-Deoxyadenosine monohydrate	Nucleotide	51500	55700	1.08155
C00147	Adenine	Nucleotide	91700	91300	0.995638
C04037	Galacturonate 1-phosphate	Nucleotide	78100	77000	0.985915
C16614	6-Methylmercaptopurine	Nucleotide	11900000	11700000	0.983193
C15587	Purine	Nucleotide	1490000	1440000	0.966443
C01762	Xanthosine	Nucleotide	43600000	40600000	0.931193
C02380	6-Mercaptopurine	Nucleotide	4120000	3820000	0.927184
	N2, N2-Dimethylguanosine	Nucleotide	107000	97900	0.914953
C02494	1-Methyladenosine	Nucleotide	69200	61300	0.885838
	2'-Deoxyadenosine-5'-monophosphate	Nucleotide	44800	38500	0.859375
C00214	Thymidine	Nucleotide	72600	60300	0.830579
C00299	Uridine	Nucleotide	2740000	2220000	0.810219
C00170	5'-Deoxy-5'-(methylthio)adenosine	Nucleotide	746000	600000	0.80429
C02242	7-Methylguanine	Nucleotide	7530	6040	0.802125
	5'-S-Methylthioadenosine	Nucleotide	806000	596000	0.739454
C00475	Cytidine	Nucleotide	554000	409000	0.738267
C00212	Adenosine	Nucleotide	12200000	8900000	0.729508
C00294	Inosine	Nucleotide	60300000	38200000	0.633499
	Succinyladenosine	Nucleotide	1730000	1070000	0.618497
C00360	2'-Deoxyinosine-5'-monophosphate	Nucleotide	2590000	1480000	0.571429
C00105	Uridine 5'-monophosphate	Nucleotide	1000000	568000	0.568
C00104	Inosine-5'-diphosphate	Nucleotide	51600	27900	0.540698
	Adenosine 5'-diphospho-glucose	Nucleotide	26000	12600	0.484615
	3'-Dephosphocoenzyme A	Nucleotide	495000	234000	0.472727
	Uridine diphosphategalactose	Nucleotide	211000	99500	0.471564
C00020,C00946,C01367	Adenosine monophosphate	Nucleotide	3300000	1370000	0.415152
C00559	2'-Deoxyadenosine	Nucleotide	95300	37700	0.395593
C02961	Cytosine arabinoside	Nucleotide	40700	15900	0.390663
C01367	Adenosine 3'-monophosphate	Nucleotide	6420000	2350000	0.366044
C00144	Guanosine 5'-monophosphate	Nucleotide	1250000	432000	0.3456
C00144	Guanosine monophosphate	Nucleotide	652000	221000	0.338957
C00130	Inosinic acid	Nucleotide	1020000	248000	0.243137
C03794	Adenylosuccinate	Nucleotide	19500	3660	0.187692
C06196	dIMP	Nucleotide	51300	2280	0.0444444
	Chinese bittersweet alkaloid II	Nitrogen compounds	2360000	8340000	3.5339
C08309	5-Methoxy-N,N-dimethyltryptamine	Nitrogen compounds	216000	429000	1.98611
	5-Methoxydimethyltryptamine	Nitrogen compounds	7770	15200	1.95624
	Etamiphylline	Nitrogen compounds	13700	24000	1.75182
	Methylergometrine	Nitrogen compounds	526000	868000	1.65019
C00588	O-Phosphocholine	Nitrogen compounds	4450000	6880000	1.54607
	Carbachol	Nitrogen compounds	43700	66100	1.51259
	4beta-Hydroxy-11-O-(2'-pyrolylcarboxy)epilupinine	Nitrogen compounds	38100	57600	1.51181
C00588	Phosphorylcholine	Nitrogen compounds	407000	566000	1.39066
C17203	N-hydroxy tryptamine	Nitrogen compounds	18100	23600	1.30387
C00114	Choline	Nitrogen compounds	6760000	8130000	1.20266
	Feruloyl putrescine O-hexoside	Nitrogen compounds	1470000	1690000	1.14966
C00719	Betaine	Nitrogen compounds	9260000	10000000	1.07991
C03375	Norspermidine	Nitrogen compounds	344000	370000	1.07558
C01479 ,C02046	Hyoscyamine	Nitrogen compounds	1100000	1180000	1.07273
	N-Acetyltryptamine	Nitrogen compounds	5170000	5400000	1.04449
C02938	3-Indoleacetonitrile	Nitrogen compounds	83000	86200	1.03855
C00847	4-Pyridoxate	Nitrogen compounds	320000	331000	1.03438
C00253	Nicotinic acid	Nitrogen compounds	478000	482000	1.00837
C00250	Pyridoxal	Nitrogen compounds	26300	24600	0.935361
C05660	Methoxy indoleacetic acid	Nitrogen compounds	299000	276000	0.923077
C00847	4-Pyridoxic acid	Nitrogen compounds	9080	8220	0.905286
C00747	Pyridine	Nitrogen compounds	200000	180000	0.9
	Cocamidopropyl betaine	Nitrogen compounds	349000	308000	0.882521
	N-Caffeoylspermidine	Nitrogen compounds	36100	30900	0.855956
C00933	Sinapine	Nitrogen compounds	187000	160000	0.855615
C00750	Spermine	Nitrogen compounds	4950000	4190000	0.846465
	5-Methoxy-3-indoleaceate	Nitrogen compounds	663000	551000	0.831071
C01004	Trigonelline	Nitrogen compounds	500000	412000	0.824
	N-Benzoyltryptamine	Nitrogen compounds	1550000	1270000	0.819355
	1H-indole-3-carboxylic acid	Nitrogen compounds	831000	666000	0.801444
C01996	Acetylcholine	Nitrogen compounds	532000	404000	0.759398
C00314	Pyridoxine	Nitrogen compounds	141000	107000	0.758865
C05659	5-Methoxytryptamine	Nitrogen compounds	103000	68700	0.66699
C00315	Spermidine	Nitrogen compounds	575000	333000	0.57913
	Indoxyl sulfate	Nitrogen compounds	72000	32400	0.45
	2-(5-hydroxy-1H-indol-3-yl)acetic acid	Nitrogen compounds	103000	32500	0.315534
C00628	Gentisic acid	Organic acid	19900	139000	6.98492
C00628	2,5-dihydroxy benzoic acid	Organic acid	115000	690000	6
C00180	Benzoic acid	Organic acid	25800	43500	1.68605
C00149	L-Malic acid	Organic acid	409000	611000	1.49389
	Tiglate	Organic acid	326000	457000	1.40184
C00632	3-Hydroxyanthranilic acid	Organic acid	189000	261000	1.38095
	b-Ala-Lys	Organic acid	137000	185000	1.35036
	2-Aminobenzoic acid	Organic acid	127000	166000	1.30709
C01035	4-Guanidinobutanoate	Organic acid	201000	248000	1.23383
C00149 C00711	Malate	Organic acid	10900000	12900000	1.18349
	DL-Pipecolinic acid	Organic acid	2550000	3000000	1.17647
C03665	2-Aminoisobutyric acid	Organic acid	3680000	4230000	1.14946
	o-Anisic acid	Organic acid	1600000	1820000	1.1375
C00245	Taurine	Organic acid	55500000	61900000	1.11532
	Azelaate	Organic acid	1060000	1070000	1.00943
	Mefenamate	Organic acid	50900	47400	0.931238
C07527	Benzocaine	Organic acid	450000	419000	0.931111
	D-Pantothenic acid	Organic acid	4170000	3830000	0.918465
C06104	Adipate	Organic acid	224000	202000	0.901786
C05570	Ergothioneine	Organic acid	8980000	7740000	0.861915
C01207	Hydroxyphenyllactic acid	Organic acid	18200	15400	0.846154
C00430	5-Aminolevulinate	Organic acid	431000	363000	0.842227
C00956	a-Aminoadipate	Organic acid	678000	505000	0.744838
C01983,C01984	Mandelic acid	Organic acid	7910	5860	0.740834
C07185	Valproic acid	Organic acid	13200	9110	0.690152
C00815	(-)-Citramalic acid	Organic acid	240000	161000	0.670833
C01984	(S)-Mandelate	Organic acid	1320000	625000	0.473485
C02504	2-Isopropylmalate	Organic acid	36400	7590	0.208516
C10208	Daidzein	Phenols	12800	19600	1.53125
	3,4-Dimethoxycinnamic acid	Phenols	463000	686000	1.48164
C06563	Genistein	Phenols	28700	40000	1.39373
	quercetin-3-beta-O-galactoside	Phenols	19500	26800	1.37436
C01477	Apigenin	Phenols	12700	17200	1.35433
C00774	Phloretin	Phenols	2270000	2360000	1.03965
	O-methylnaringenin C-pentoside	Phenols	56400	57200	1.01418
	3,7-Dihydroxy-3',4'-dimethoxyflavone	Phenols	12400000	12300000	0.991935
C00811	4-Hydroxycinnamic acid	Phenols	30100	29000	0.963455
C01772	2-Hydroxycinnamic acid	Phenols	1170000	1100000	0.940171
	5-Methoxyflavanone	Phenols	306000	260000	0.849673
C00423	trans-Cinnamic acid	Phenols	75500	60600	0.802649
	3,4-Dihydroxyhydrocinnamic acid	Phenols	57700	45500	0.788562
	DL-3,4-Dihydroxymandelic acid	Phenols	361000	281000	0.778393
	di-C,C-hexosyl-chrysoeriol	Phenols	141000	107000	0.758865
C08432	Crotonoside	Others	100000	3600000	36
C00270	N-Glycolylneuraminate	Others	258	5500	21.3178
C06314	Lipoxin A4	Others	100	724	7.24
C08996	Biflorin	Others	102000	731000	7.16667
	10,11-trans-Dihydroxy-10,11-dihydrocarbamazepine	Others	68600	136000	1.98251
C00791	Creatinine	Others	49000	96500	1.96939
C01470	Acacetin	Others	29000	53200	1.83448
	2-[6-(diethylamino)purin-9-yl]-5-(hydroxymethyl)oxolane-3,4-diol	Others	1690	3040	1.79882
	2,3-Diphosphoglyceric acid	Others	319000	561000	1.75862
C01718	Kynurenine	Others	1120000	1920000	1.71429
C08497	trans-2-Hexenal	Others	1900000	2680000	1.41053
C00755	Vanillin	Others	8320	11700	1.40625
C05682	Phosphonoacetate	Others	300000	414000	1.38
C00632	3-Hydroxyanthranilic acid	Others	20400	27400	1.34314
	Nicotinic acid derivatives	Others	3460000	4590000	1.32659
C03758	Hydroxyphenethylamine	Others	32700	42900	1.31193
C09305	Psoralen	Others	20100	25700	1.27861
C07565	N-Phenylacetamide	Others	388000	496000	1.27835
C02713	N-Acetylmuramate	Others	219000	273000	1.24658
	Oryzalexin C	Others	80500	98600	1.22484
C11110	Imidacloprid	Others	12400	14400	1.16129
C00120	Biotin	Others	37000	42400	1.14595
	Dimethenamid-OXA	Others	14000	16000	1.14286
	DL-alpha,epsilon-Diaminopimelic acid	Others	60500	68800	1.13719
	g-Guanidinobutyrate	Others	261000	292000	1.11877
C08898	Diosgenin	Others	4620000	5110000	1.10606
	Cocarboxylase	Others	42400	46300	1.09198
C00388	Histamine	Others	6780	7370	1.08702
C01517	Naproxen	Others	3760000	4080000	1.08511
C00074	Phosphoenolpyruvate	Others	72000	77900	1.08194
	Dodecyl (dimethyl) amine oxide	Others	519000	548000	1.05588
C09712	Polygodial	Others	149000	157000	1.05369
	Rhodomyrtone	Others	3080000	3200000	1.03896
C02283	Enoxolone	Others	854000	886000	1.03747
	Ethyl 3,4-dihydroxybenzoate	Others	355000	368000	1.03662
C06804	Paracetamol	Others	80600	83300	1.0335
C00864	Pantothenic acid	Others	4910000	5070000	1.03259
C00061	Flavin Mononucleotide	Others	73900	75300	1.01894
C07166	Triethylenetetramine	Others	26100000	26400000	1.01149
C09264	Esculin	Others	28100	28200	1.00356
	Benzophenone-2	Others	15200	15100	0.993421
C00788	Epinephrine	Others	329000	326000	0.990881
C00255	Riboflavin	Others	108000	107000	0.990741
	E-3,4,5'-Trihydroxy-3'-glucopyranosylstilbene	Others	242000	239000	0.987603
	Nw-Acetylhistamine	Others	152000	147000	0.967105
	4, 7, 10-Trioxa-1,13-tridecanediamine	Others	22900000	22100000	0.965066
	Syringaldehyde	Others	501000	475000	0.948104
C01864	8-Methoxypsoralen	Others	79600	75400	0.947236
C11129	Isatin	Others	408000	386000	0.946078
C01691	Diflunisal	Others	36200	34200	0.944751
C00864	Pantothenate	Others	10600000	10000000	0.943396
C02421	Isonicotinamide	Others	47900000	45100000	0.941545
C00449	L-Saccharopine	Others	437000	411000	0.940503
C01784	Benzamidine	Others	4740000	4400000	0.92827
	7-chloro-4-methyl-2-oxochromen-6-yl propanoate	Others	229000	209000	0.912664
	L-Methionine sulfone	Others	4700000	4270000	0.908511
	Norfenfluramine	Others	2340000	2080000	0.888889
	1-(2,3-dibenzimidazol-2-ylpropyl)-2-methoxybenzene	Others	20600	17700	0.859223
C01950	Picolinamide	Others	28300000	24200000	0.855124
C07146	Metaraminol	Others	533000	455000	0.853659
	6a_Methylprednisolone	Others	66100	56200	0.850227
C07435	Phenoxybenzamine	Others	43800	37200	0.849315
C09815	Benzamide	Others	10600	8760	0.826415
C00408	Pipecolinic acid	Others	7730000	6380000	0.825356
C11004	2,6-Dimethylaniline	Others	245000	196000	0.8
	Yohimbinic acid	Others	6680000	5270000	0.788922
C00255	Vitamin B2	Others	3390000	2670000	0.787611
	Tianshic acid	Others	2520	1940	0.769841
C03410	N-acetylneuraminic acid	Others	357000	262000	0.733894
	MNA-hex-p	Others	59700	43600	0.730318
C07371	Primidone	Others	41900	28800	0.687351
C00547	Noradrenaline	Others	28300	18400	0.650177
C00378	Thiamine	Others	77400	45200	0.583979
C19432	Hycanthone	Others	14000	8130	0.580714
	3(2'-Chlorophenyl)-7-hydroxy-4-phenylcoumarin	Others	462000	260000	0.562771
C00860	Histidinol	Others	14400000	8000000	0.555556
	Digitoxigenine	Others	183000	93600	0.511475
	1-Adamantanamine	Others	31100	14100	0.453376
	Lycoperodine	Others	15300	5550	0.362745
C00130	Inosine 5'-monophosphate	Others	810000	246000	0.303704
C02734	Phenyl phosphate	Others	846000	154000	0.182033

## Sheet: Liver-diff
Metabolites significantly changed in liver			Content(Value)				Log2Value (Heatmap)
KEGG_ID	Biochemical_Name	Classe	Control	DGLHD	Fold change		Control	DGLHD
	13-Hydroxy octadecatrienoic acid	Lipid	1480	7300	4.93243		10.5314	12.8337
C02165	Leucotriene B4	Lipid	5760	22500	3.90625		12.4919	14.4576
C05951	Leucotriene D4	Lipid	18600	64700	3.47849		14.183	15.9815
C05957	Prostaglandin J2	Lipid	275000	925000	3.36364		18.0691	19.8191
	13-hydroperoxy octadecatrienoic acid	Lipid	12100	22500	1.8595		13.5627	14.4576
	9-Hydroxy-(10E,12Z,15Z)-octadecatrienoic acid	Lipid	16500	29400	1.78182		14.0102	14.8435
	8,15-dihydroxy eicosatetraenoic acid	Lipid	45700	80100	1.75274		15.4799	16.2895
	5S,12R-dihydroxy-6Z,8E,10E,14Z,17Z-eicosapentaenoic acid	Lipid	59800	100000	1.67224		15.8679	16.6096
C00410	Progesterone	Lipid	23200	35700	1.53879		14.5018	15.1236
	Lysophosphatidylcholine (1-acyl 18:2)	Lipid	14300000	6260000	0.437762		23.7695	22.5777
C00187	Cholesterol	Lipid	35300	14900	0.422096		15.1074	13.863
C00639	Prostaglandin F2a	Lipid	55300	9830	0.177758		15.755	13.263
	S-Carboxymethylcysteine	Amino acid	2100	17700	8.42857		11.0362	14.1115
C03406	Argininosuccinate	Amino acid	8440	66400	7.8673		13.043	16.0189
C00819	D-Glutamine	Amino acid	104000	270000	2.59615		16.6662	18.0426
C02712	N-Acetylmethionine	Amino acid	66900	125000	1.86846		16.0297	16.9316
C01586	Hippuric acid	Amino acid	11600	21100	1.81897		13.5018	14.365
	Tiglylglycine	Amino acid	19900	35300	1.77387		14.2805	15.1074
C00328	L-Kynurenine	Amino acid	299000	478000	1.59866		18.1898	18.8667
C00064	L-Glutamine	Amino acid	2960000	4710000	1.59122		21.4972	22.1673
	beta-Homothreonine	Amino acid	1280000	2020000	1.57812		20.2877	20.9459
	3-Iodotyrosine	Amino acid	86700	130000	1.49942		16.4037	16.9882
C03519	N-Acetyl-L-phenylalanine	Amino acid	346000	172000	0.49711		18.4004	17.392
C18623	Phenylglycine	Amino acid	103000	45700	0.443689		16.6523	15.4799
	N-Acetylglutamate	Amino acid	242000	89200	0.368595		17.8846	16.4448
	N-Acetylleucine	Amino acid	2750000	755000	0.274545		21.391	19.5261
C00407	L-Isoleucine	Amino acid	9740000	1010000	0.103696		23.2155	19.9459
	D-(+)-Trehalose	Carbohydrate	5890	12400	2.10526		12.5241	13.5981
C00092	Glucose 6-phosphate	Carbohydrate	5020	8880	1.76892		12.2935	13.1163
C00031	D-Glucose	Carbohydrate	944000	469000	0.496822		19.8484	18.8392
	Glucose 1-phosphate	Carbohydrate	1500	728	0.485333		10.5507	9.50779
	Fructose 1,6-diphosphate	Carbohydrate	7770000	3660000	0.471042		22.8895	21.8034
C01835	Maltotriose	Carbohydrate	105000	35400	0.337143		16.68	15.1115
C00387	Guanosine	Nucleotide	462000	3260000	7.05628		18.8175	21.6364
	Nicotinic acid mono nucleotide	Nucleotide	26900	91100	3.38662		14.7153	16.4752
	Uridine 5'-diphospho-D-glucose	Nucleotide	15100	47200	3.12583		13.8823	15.5265
C00008	Adenosine 5'-diphosphate	Nucleotide	15300	44200	2.88889		13.9012	15.4318
C00242	Guanine	Nucleotide	13900	36900	2.65468		13.7628	15.1713
	Guanine derivative	Nucleotide	46400	91200	1.96552		15.5018	16.4767
	Adenosine 5'-diphospho-glucose	Nucleotide	26000	12600	0.484615		14.6662	13.6211
	3'-Dephosphocoenzyme A	Nucleotide	495000	234000	0.472727		18.9171	17.8361
	Uridine diphosphategalactose	Nucleotide	211000	99500	0.471564		17.6869	16.6024
C00020,C00946,C01367	Adenosine monophosphate	Nucleotide	3300000	1370000	0.415152		21.654	20.3857
C00559	2'-Deoxyadenosine	Nucleotide	95300	37700	0.395593		16.5402	15.2023
C02961	Cytosine arabinoside	Nucleotide	40700	15900	0.390663		15.3127	13.9567
C01367	Adenosine 3'-monophosphate	Nucleotide	6420000	2350000	0.366044		22.6141	21.1642
C00144	Guanosine 5'-monophosphate	Nucleotide	1250000	432000	0.3456		20.2535	18.7207
C00144	Guanosine monophosphate	Nucleotide	652000	221000	0.338957		19.3145	17.7537
C00130	Inosinic acid	Nucleotide	1020000	248000	0.243137		19.9601	17.92
C03794	Adenylosuccinate	Nucleotide	19500	3660	0.187692		14.2512	11.8376
C06196	dIMP	Nucleotide	51300	2280	0.0444444		15.6467	11.1548
	Chinese bittersweet alkaloid II	Nitrogen compounds	2360000	8340000	3.5339		21.1704	22.9916
C08309	5-Methoxy-N,N-dimethyltryptamine	Nitrogen compounds	216000	429000	1.98611		17.7207	18.7106
	5-Methoxydimethyltryptamine	Nitrogen compounds	7770	15200	1.95624		12.9237	13.8918
	Etamiphylline	Nitrogen compounds	13700	24000	1.75182		13.7419	14.5507
	Methylergometrine	Nitrogen compounds	526000	868000	1.65019		19.0047	19.7273
C00588	O-Phosphocholine	Nitrogen compounds	4450000	6880000	1.54607		22.0854	22.714
	Carbachol	Nitrogen compounds	43700	66100	1.51259		15.4153	16.0124
	4beta-Hydroxy-11-O-(2'-pyrolylcarboxy)epilupinine	Nitrogen compounds	38100	57600	1.51181		15.2175	15.8138
	Indoxyl sulfate	Nitrogen compounds	72000	32400	0.45		16.1357	14.9837
	2-(5-hydroxy-1H-indol-3-yl)acetic acid	Nitrogen compounds	103000	32500	0.315534		16.6523	14.9882
C00628	Gentisic acid	Organic acid	19900	139000	6.98492		14.2805	17.0847
C00628	2,5-dihydroxy benzoic acid	Organic acid	115000	690000	6		16.8113	19.3962
C00180	Benzoic acid	Organic acid	25800	43500	1.68605		14.6551	15.4087
C01984	(S)-Mandelate	Organic acid	1320000	625000	0.473485		20.3321	19.2535
C02504	2-Isopropylmalate	Organic acid	36400	7590	0.208516		15.1517	12.8899
C10208	Daidzein	Phenols	12800	19600	1.53125		13.6439	14.2586
C08432	Crotonoside	Others	100000	3600000	36		16.6096	21.7796
C00270	N-Glycolylneuraminate	Others	258	5500	21.3178		8.01123	12.4252
C06314	LipoxinA4	Others	100	724	7.24		6.64386	9.49985
C08996	Biflorin	Others	102000	731000	7.16667		16.6382	19.4795
	10,11-trans-Dihydroxy-10,11-dihydrocarbamazepine	Others	68600	136000	1.98251		16.0659	17.0532
C00791	Creatinine	Others	49000	96500	1.96939		15.5805	16.5582
C01470	Acacetin	Others	29000	53200	1.83448		14.8238	15.6991
	2-[6-(diethylamino)purin-9-yl]-5-(hydroxymethyl)oxolane-3,4-diol	Others	1690	3040	1.79882		10.7228	11.5699
	2,3-Diphosphoglyceric acid	Others	319000	561000	1.75862		18.2832	19.0976
C01718	Kynurenine	Others	1120000	1920000	1.71429		20.0951	20.8727
	1-Adamantanamine	Others	31100	14100	0.453376		14.9246	13.7834
	Lycoperodine	Others	15300	5550	0.362745		13.9012	12.4383
C00130	Inosine 5'-monophosphate	Others	810000	246000	0.303704		19.6276	17.9083
C02734	Phenyl phosphate	Others	846000	154000	0.182033		19.6903	17.2326
